# Supplementary material for: Multilevel Gene Regulation Using Switchable Transcription Terminator and Toehold Switch in Escherichia coli
Source: MDPI journal article supplement (doi:10.3390/app11104532), 2021-05-16
Supplement: s1 [file s1]

# Multilevel Gene Regulation using Switchable Transcription Terminator and Threshold Switch in *Escherichia coli*

## Supplementary Information

Seongho Hong, Jeongwon Kim and Jongmin Kim \*

Department of Life Sciences, Pohang University of Sciences and Technology, Pohang, Republic of Korea.

\* Correspondence: jongmin.kim@postech.ac.kr

### Detailed Experimental Protocols

#### Flow Cytometry Analysis

Cells were grown in shaking liquid culture (LB media with proper antibiotics) at 37 °C overnight. Following this, the culture was diluted 1/50-fold (1× M9 media with proper antibiotics) and IPTG (1 mM) was treated immediately. Induction was done at 37 °C for 4 hours. After the induction, OD600 value was measured using BioTek Synergy H1 plate reader (BioTek, Winooski, VT, USA), and for cell number normalization, each sample was diluted using 1× phosphate-buffered saline (PBS) according to the OD600 values (to 0.1~0.2). Final FACS sample volume was 100 µL in a 96-well black plate (SPL Life Science, Pocheon, Korea), and the number of replicates was three for each condition. Flow cytometry measurements were performed using a CytoFLEX Flow Cytometer (Beckman Coulter, Pasadena, CA, USA) and 15,000 cell events were recorded for each measurement. Cell populations were gated according to their forward scatter and side scatter distribution, and sample flow rate was set by 40 µL/min. GFP fluorescence was calculated by geometric mean value, including populations of approximately 80% or more of the total events. Acquired data were analyzed using CytExpert software (Beckman Coulter, Pasadena, CA, USA).

#### Total RNA Extraction for Quantitative PCR

Cells were grown in shaking liquid culture (LB media with proper antibiotics) at 37 °C overnight. Following this, the culture was diluted 1/50-fold (1× M9 media with proper antibiotics) and IPTG (1 mM) was treated immediately. Induction was done at 37 °C for 4 hours. (All subsequent steps were done in DNase, RNase free condition.) For each experiment condition, 1.2 mL of cells were collected from three triplicated wells (400 µL, each). Cells were pelleted by centrifugation at 13,000 rpm for 3 min. The supernatant was removed, and the remaining pellet was resuspended in 1 mL of RiboEx (GeneAll, Seoul, Korea) reagent. Samples were stored at –80 °C overnight and defrosted on ice. After short vortexing, the samples were incubated at room temperature during 5 min for homogenization. 200 µL of chloroform (Daejung Chemicals & Metals, Siheung, Korea) was added, and the samples were mixed by short vortexing and incubated at room temperature for 3 min. Following incubation, the samples were centrifuged for 15 min at 12,000 rpm at 4 °C, and 400 µL of the top aqueous layer was added into 500 µL of isopropanol (Sigma-Aldrich, Munich, Germany). After gentle inverting, samples were incubated at room temperature for 10 min and centrifuged for 15 min at 13,000 rpm at 4 °C. The isopropanol was carefully removed from RNA pellets, washed in 1 mL of 70% ethanol (EtOH), and tubes were centrifuged for another 2 min at 13,000 rpm at 4 °C to remove left ethanol perfectly. Pellets were air-dried for 5 min and resuspended in 20 µL of RNase free pure water (Enzynomics, Daejeon, Korea) for 20 min.

#### Normalization of Total RNA, Reverse Transcription and qPCR Measurements

To enable comparison between different samples, each total RNA sample was normalized to the same concentration. Initial sample concentration and purity were measured using BioTek Synergy H1 plate reader, and each sample was diluted to 250 ng/μL in RNase free pure water. One microliter of this total RNA (250 ng), GoScript™ Reverse Transcription Mix (Promega, Madison, WI, USA) 1 rxn, and GFP specific reverse transcription primer (Table S8) 2 μM were used for cDNA synthesis, and the total mix was incubated at 25 °C 5 min, 42 °C 60 min, 70 °C 15 min 1 cycle, and cooled on ice for 10 min. For reference gene (16S rRNA), the same amount of total RNA (250 ng) and GoScript™ Reverse Transcription Mix with random primers were used for cDNA synthesis. Following cooldown, each cDNA sample was diluted 1/30 fold using DNase free pure water. Four microliter of this cDNA, 5 μL of ORA™ qPCR Green ROX L Mix (2×) (highQu, Kraichtal, Germany), and 1 μL of GFP or 16S rRNA specific qPCR primers (forward/ reverse each 0.5 μL, 250 nM) (Table S8) were mixed for quantitative PCR. A Stratagene Mx3000P (Agilent Technologies, Santa Clara, CA, USA) was used for qPCR data collection using the following thermal program: 50 °C for 2 min, 95 °C for 10 min, followed by 40 cycles of 95 °C for 15 s and 60 °C for 1 min. All of the measurements were followed by melting curve analysis. A Non-Skirted Clear 96 Well PCR plates (Neptune, San Diego, CA, USA) and a Flat PCR Cap (Kirgen, Shanghai, China) were used for all measurements. Ct values were analyzed using MxPRO software (Agilent Technologies, Santa Clara, CA, USA).

### Plate-reader Analysis for TetR

Cells were grown in shaking liquid culture (LB media with proper antibiotics) at 37 °C overnight. Following this, the culture was diluted 1/100 fold (LB media with proper antibiotics). After 80 min of recovery, IPTG (1 mM) and aTc (0 ng or 40 ng/mL) were treated and induction was done at 37 °C for 3 hour 30 mins. Following the induction, OD600 value and GFP fluorescence (excitation: 479 nm, emission: 520 nm) were measured using BioTek Synergy H1 plate reader. The number of replicates was three for each condition. GFP fluorescence data were normalized by OD600 values (GFP/OD600).

### Supplementary Tables

**Supplementary Table S1.** Plasmids Used in This Study. Abbreviations are as follows: T7term = T7 terminator, T500term = T500 terminator, AmpR = ampicillin resistance gene, SpecR = spectinomycin resistance gene, KanR = kanamycin resistance gene, CmR = chloramphenicol resistance gene.

| Name.                 | Plasmid architecture                                             | Figure                 |
|-----------------------|------------------------------------------------------------------|------------------------|
| <b>Decoy</b>          |                                                                  |                        |
| pET_Decoy             | pT7-decoy-T7term-AmpR-pBR322 origin                              | 2, 3, 4, 4, S2, S3, S4 |
| pCDF_Decoy            | pT7-decoy-T7term-SpecR-CloDF13 origin                            | 6, S4, S5              |
| <b>SWT, STAR, THS</b> |                                                                  |                        |
| T500_SWT              | pJ23119-T500_SWT-linker A-GFPmut3b-T7term-KanR-ColA origin       | 2, 3, 4, S1, S2        |
| BBa_SWT               | pJ23119-BBa_SWT-linker A-GFPmut3b-T7term-KanR-ColA origin        | 3, S1                  |
| STAR_target_WT        | pJ23119-STAR_target_WT-linker A-GFPmut3b-T7term-KanR-ColA origin | 3, S1                  |
| STAR_target_1         | pJ23119-STAR_target_1-linker A-GFPmut3b-T7term-KanR-ColA origin  | 3                      |
| THS_A                 | pT7-THS_A-linker A-GFPmut3b-T7term-KanR-ColA origin              | 5, S3, S4              |
| THS_B                 | pT7-THS_B-linker A-GFPmut3b-T7term-KanR-ColA origin              | 5, S3, S4              |
| THS_C                 | pT7-THS_C-linker A-GFPmut3b-T7term-KanR-ColA origin              | 3                      |
| T500_SWT_P1V1         | pJ23119-T500_SWT_P1V1-linker A-GFPmut3b-T7term-KanR-ColA origin  | 4                      |

|                                |                                                                           |                        |
|--------------------------------|---------------------------------------------------------------------------|------------------------|
| T500_SWT_P1V2                  | pJ23119–T500_SWT_P1V2–linker A–GFPmut3b–T7term–KanR–ColA origin           | 4                      |
| T500_SWT_P1V3                  | pJ23119–T500_SWT_P1V3–linker A–GFPmut3b–T7term–KanR–ColA origin           | 4                      |
| T500_SWT_P2V3                  | pJ23119–T500_SWT_P2V3–linker A–GFPmut3b–T7term–KanR–ColA origin           | 4                      |
| T500_SWT_P3V3                  | pJ23119–T500_SWT_P3V3–linker A–GFPmut3b–T7term–KanR–ColA origin           | 4                      |
| T500_SWT_THS_A                 | pJ23119–T500_SWT–linker B–THS_A–linker A–GFPmut3b–T7term–KanR–ColA origin | 5, S3, S4              |
| T500_SWT_THS_B                 | pJ23119–T500_SWT–linker C–THS_B–linker A–GFPmut3b–T7term–KanR–ColA origin | 5, S3, S4              |
| Koeppl's_AND-gate              | pJ23119–Target_6–Toehold_3–GFPmut3b–T7term–KanR–ColA origin               | 5, S4                  |
| T500_SWT_THS_A_mCherry         | pJ23119–T500_SWT–linker B–THS_A–linker A–mCherry–T7term–CmR–p15A origin   | S5                     |
| T500_SWT_THS_B_mCherry         | pJ23119–T500_SWT–linker C–THS_B–linker A–mCherry–T7term–CmR–p15A origin   | 6                      |
| T500_SWT_2                     | pJ23119–T500_SWT_2–linker A–GFPmut3b–T7term–KanR–ColA origin              | S2                     |
| T500_SWT_3                     | pJ23119–T500_SWT_3–linker A–GFPmut3b–T7term–KanR–ColA origin              | S2                     |
| TetO_GFP                       | pT7–TetO–GFPmut3b–T7term–KanR–ColA origin                                 | 7                      |
| TetR_negative                  | pT7–TetR(No RBS)–T7term–SpecR–CloDF13 origin                              | 7                      |
| J23119_T500_SWT_TetR           | pJ23119–T500_SWT–linker A–TetR–T7term–SpecR–CloDF13 origin                | 7                      |
| pLlacO_AD1_TetR                | pLlacO–STAR_target_WT–linker A–TetR–T7term–SpecR–CloDF13 origin           | 7                      |
| pLlacO_THS_A_TetR              | pLlacO–THS_A–linker A–TetR–T7term–SpecR–CloDF13 origin                    | 7                      |
| <b>Trigger</b>                 |                                                                           |                        |
| T500_SWT_trigger               | pT7–T500_SWT_trigger–T7term–AmpR–pBR322 origin                            | 2, 3, 4, 7, S2, S3, S4 |
| BBa_SWT_trigger                | pT7–BBa_SWT_trigger–T7term–AmpR–pBR322 origin                             | 3                      |
| STAR_target_WT_trigger         | pT7–STAR_target_WT_trigger–T7term–AmpR–pBR322 origin                      | 3, 7                   |
| STAR_target_1_trigger          | pT7–STAR_target_1_trigger–T7term–AmpR–pBR322 origin                       | 3                      |
| THS_A_trigger                  | pT7–THS_A_trigger–T7term–AmpR–pBR322 origin                               | 5, 7, S3               |
| THS_B_trigger                  | pT7–THS_B_trigger–T7term–AmpR–pBR322 origin                               | 5, S3                  |
| THS_C_trigger                  | pT7–THS_C_trigger–T7term–AmpR–pBR322 origin                               | 3                      |
| T500_SWT_P1V1_trigger          | pT7–T500_SWT_P1V1_trigger–T7term–AmpR–pBR322 origin                       | 4                      |
| T500_SWT_P2V1_trigger          | pT7–T500_SWT_P2V1_trigger–T7term–AmpR–pBR322 origin                       | 4                      |
| Koeppl's_STAR                  | pT7–STAR_6–T500term–SpecR–CloDF13 origin                                  | 5, S4                  |
| Koeppl's_trigger               | pT7–Trigger_3–T500term–AmpR–pBR322 origin                                 | 5, S4                  |
| THS_B_trigger_pCDF             | pT7–THS_B_trigger–T7term–SpecR–CloDF13 origin                             | 6, S5                  |
| T500_SWT_trigger_THS_A_trigger | pT7–T500_SWT_trigger–T7term–pT7–THS_A_trigger–T7term–AmpR–pBR322 origin   | 5, 6, S5               |
| T500_SWT_trigger_Decoy         | pT7–T500_SWT_trigger–T7term–pT7–decoy–T7term–AmpR–pBR322 origin           | 5, 6, S5               |
| Decoy_THS_A_trigger            | pT7–decoy–T7term–pT7–THS_A_trigger–T7term–AmpR–pBR322 origin              | 5, 6, S5               |
| Decoy_Decoy                    | pT7–decoy–T7term–pT7–decoy–T7term–AmpR–pBR322 origin                      | 5, 6, S5               |
| T500_SWT_trigger_THS_B_trigger | pT7–T500_SWT_trigger–T7term–pT7–THS_B_trigger–T7term–AmpR–pBR322 origin   | 5                      |
| Decoy_THS_B_trigger            | pT7–decoy–T7term–pT7–THS_B_trigger–T7term–AmpR–pBR322 origin              | 5                      |
| T500_SWT_2_trigger             | pT7–T500_SWT_2_trigger–T7term–AmpR–pBR322 origin                          | S2                     |
| T500_SWT_3_trigger             | pT7–T500_SWT_3_trigger–T7term–AmpR–pBR322 origin                          | S2                     |

Supplementary Table S2. Examples of DNA Plasmid Sequences.

| Name (architecture)                                                                      | Sequence                                                                                                                                                                                                                                                                                                                                                                                                                                                                                                                                                                                                                                                                                                                                                                                                                                                                                                                                                                                                                                                                                                                                                                                                                                                                                                                                                                                                                                                                                                                                                                                                                                                                                                                                                                                                                                                                                                                                                                                                                                                                                                                                                                                                                                                                                                                                                                                                                                                                                                                                                                                                                                                                                                                                                                                                                                                                                                                                                                                                                                                                                                                                                                                                                                                                                                                                                                                                                                                                                                                                                                                                                                                                                                                                                                                                                                                                                                                |
|------------------------------------------------------------------------------------------|-------------------------------------------------------------------------------------------------------------------------------------------------------------------------------------------------------------------------------------------------------------------------------------------------------------------------------------------------------------------------------------------------------------------------------------------------------------------------------------------------------------------------------------------------------------------------------------------------------------------------------------------------------------------------------------------------------------------------------------------------------------------------------------------------------------------------------------------------------------------------------------------------------------------------------------------------------------------------------------------------------------------------------------------------------------------------------------------------------------------------------------------------------------------------------------------------------------------------------------------------------------------------------------------------------------------------------------------------------------------------------------------------------------------------------------------------------------------------------------------------------------------------------------------------------------------------------------------------------------------------------------------------------------------------------------------------------------------------------------------------------------------------------------------------------------------------------------------------------------------------------------------------------------------------------------------------------------------------------------------------------------------------------------------------------------------------------------------------------------------------------------------------------------------------------------------------------------------------------------------------------------------------------------------------------------------------------------------------------------------------------------------------------------------------------------------------------------------------------------------------------------------------------------------------------------------------------------------------------------------------------------------------------------------------------------------------------------------------------------------------------------------------------------------------------------------------------------------------------------------------------------------------------------------------------------------------------------------------------------------------------------------------------------------------------------------------------------------------------------------------------------------------------------------------------------------------------------------------------------------------------------------------------------------------------------------------------------------------------------------------------------------------------------------------------------------------------------------------------------------------------------------------------------------------------------------------------------------------------------------------------------------------------------------------------------------------------------------------------------------------------------------------------------------------------------------------------------------------------------------------------------------------------------------------|
| pET_Deco (pT7-de-<br>coy-T7term-Bla Pro-<br>moter)-AmpR-<br>pBR322 origin-back-<br>bone) | <p> <b>TAATACGACTCACTATAGG</b>GTCTCACGCCCTCAGCTGGGCGTGA-<br/> GATGAGCCTCGTCTCCAGATGACGAGGCAACGTAGGATCTGACTGATCCTACTAT<b>TAGCATAA</b><br/> <b>CCCCTTGGGGCCTCTAAACGGGTCTTGAGGGGTTTTTG</b>CTGAAAGGAGGAACATATATCCG-<br/> GATATCCCGCAAGAGGCCCGGCAGTACCGGCATAACCAAGCCTATGCCTACAGCATCCAGGG<br/> TGACGGTGCCGAGGATGACGATGAGCGCATTGTTAGATTTTCATACAC-<br/> GGTGCCTGACTGCGTTAGCAATTTAACTGTGATAAACTACCGCATTAAAGCTTATCGATGATA<br/> AGCTGTCAAACATGAGAATTCTTGAAGACGAAAGGGCCTCGTGATACGCC-<br/> TATTTTTATAGGTTAATGTCATGATAATAATGGTTTCTTAGACGTCAGGTGGCACTTTTCGGGG<br/> AAATGTGCGCGGAACCCCTATTTGTTTATTTTTCTAAATACAT<b>TCAAA-</b><br/> <b>TATGTATCCGCTCATGAGACAAT</b>AACCCTGATAAATGCTTCAATAATATTGAAAAAGGAAGA<br/> GTATGAGTATTCAACATTTCCGTGTCGCCCTTATTCCCTTTTTTGCGGCATTTT-<br/> GCCTTCCTGTTTTGCTCACCCAGAAACGCTGGTGAAAGTAAAAGATGCTGAAGATCAGTTGG<br/> GTGCACGAGTGGGTTACATCGAACTGGATCTCAACAGCGGTAAGATCCTTGAGAG-<br/> TTTTCGCCCCGAAGAACGTTTTCCAATGATGAGCACTTTTAAAGTTCTGCTATGTGGCGCGGTA<br/> TTATCCCGTGTTGACGCCGGGCAAGAGCAACTCGGTGCGCCGCATACAC-<br/> TATTCTCAGAATGACTTGTTGAGTACTCACCAGTCACAGAAAAGCATCTTACGGATGGCATG<br/> ACAGTAAGAGAATTATGCAGTGCTGCCATAACCATGAGTGATAACAC-<br/> TGCGGCCAACTTACTTCTGACAACGATCGGAGGACCGAAGGAGCTAACCCTTTTTTGACAA<br/> CATGGGGGATCATGTAACCTCGCTTGATCGTTGGGAACCGGAGCTGAATGAA-<br/> GCCATACCAAACGACGAGCGTGACACCAGATGCCTGCAGCAATGGCAACAACGTTGCGCAA<br/> ACTATTAACCTGGCGAACTACTTACTCTAGCTTCCCGGCAACAATTAATAGACTG-<br/> GATGGAGGCGGATAAAGTTGCAGGACCCTTCTGCGCTCGGCCCTCCGGCTGGCTGGTTTAT<br/> TGCTGATAAATCTGGAGCCGCTGAGCGTGGGTCTCGCGGTATCATTGCAGCAC-<br/> TGGGGCCAGATGGTAAGCCCTCCCGTATCGTAGTTATCTACACGCGGGAGTCAGGCAACT<br/> ATGGATGAACGAAATAGACAGATCGCTGAGATAGGTGCCTCACTGATTAAGCATTGG-<br/> TAACTGTGACACCAAGTTTACTCATATATACTTTAGATTGATTAAAACTTCATTTTTTAATTTA<br/> AAAGGATCTAGGTGAAGATCCTTTTTGATAATCTCATGACCAAAATCCCTTAACGTGAG-<br/> TTTTCGTTCCACTGAGCGTCAGACCCCGTAGAAAAGATCAAAGGATCTTCTTGAGATCCTTTTT<br/> TTCTGCGCGTAATCTGCTGCTTGCAAACAAAAAAACCACCGCTACCAGCGGTGGTTTGTGTT-<br/> GCCGGATCAAGAGCTACCAACTCTTTTTCCGAAGGTAAGTGGCTTACGACAGAGCGCAGATACC<br/> AAATACTGTCTTCTAGTGAGCCGTAGTTAGGCCACCACTTCAAGAACTCTGTAGCAC-<br/> CGCCTACATACCTCGCTCTGCTAATCCTGTTACCAGTGGCTGCTGCCAGTGGCGATAAGTCGT<br/> GTCTTACCGGGTTGGACTCAAGACGATAGTTACCGGATAAGGCGCAGCGGTGCGGCTGAAC-<br/> GGGGGGTTCTGTGCACACAGCCAGCTTGGAGCGAACGACCTACACCGAACTGAGATACCTAC<br/> AGCGTGAGCTATGAGAAAGCGCCACGCTTCCCGAAGGGAGAAAGGCGGACAGGTATCCGG-<br/> TAAGCGGCAGGGTCGGAACAGGAGAGCGCACGAGGGAGCTTCCAGGGGGAAACGCCTGGTA<br/> TCTTTATAGTCTGTGCGGTTTCGCCACCTCTGACTTGAGCGTCGATTTTT-<br/> GTGATGCTCGTCAGGGGGGCGGAGCCTATGGAA<b>AAACGCCAGCAACGCGGCCTTTTTACGGT</b><br/> TCTGGCCTTTTTGCTGGCCTTTTGCTCACATGTTCTTTCCTGCGTTATCCCTGATTCTGTG-<br/> GATAACCGTATTACCGCCTTTGAGTGAGCTGATACCGCTCGCCGCAGCCGAACGACCGAGCG<br/> CAGCGAGTCAGTGAGCGAGGAAGCGGAAGAGCGCCTGATGCGGTATTTCTCCTTAC-<br/> GCATCTGTGCGGTATTTACACCGCATATATGGTGCACTCTCAGTACAATCTGCTCTGATGCC<br/> GCATAGTTAAGCCAGTATACACTCCGCTATCGCTAC-<br/> GTGACTGGGTGATGGCTGCGCCCCGACACCCGCCAACACCCGCTGACGCGCCCTGACGGGCTT<br/> GTCTGCTCCCGGCATCCGCTTACAGACAAGCTGTGACCGTCTCCGGGAGCTG-<br/> CATGTGTCAGAGGTTTTACCGTCATACCGAAACGCGCGAGGCAGCTGCGGTAAAGCTCATC<br/> AGCGTGGTCGTGAAGCGATTACAGATGTCTGCCTGTTTCCGCGTCCAGCTCGTTGAG-<br/> TTTCTCCAGAAAGCGTTAATGTCTGGCTTCTGATAAAGCGGGCCATGTTAAGGGCGGTTTTTTCC<br/> TGTTTGGTCACTGATGCCTCCGTGTAAGGGGGATTCTGTTTATGCGGGTAATGATAC-<br/> CGATGAAACGAGAGAGGATGCTCACGATACGGGTTACTGATGATGAACATGCCCGGTTACTG<br/> GAACGTTGTGAGGGTAACAACCTGGCGGTATGGATGCGGCGGGACCAGAGAAAAATCAC-<br/> TCAGGGTCAATGCCAGCGCTTCGTTAATACAGATGTAGGTGTTCCACAGGGTAGCCAGCAGC<br/> ATCCTGCGATGCAGATCCGGAACATAATGGTG-<br/> CAGGGCGCTGACTTCCGCGTTTTCCAGACTTTACGAAACACGGAAACCGAAGACCATTTCATGTT<br/> GTTGCTCAGGTCGCAGACGTTTTGTCAGCAGCAGTCGCTTACAGTTCGCTCGCG-<br/> TATCGGTGATTTCATTCTGCTAACAGTAAGGCAACCCCGCCAGCCTAGCCGGGTCTCAACGA<br/> CAGGAGCACGATCATGCGCACCCGTGGCCAGGACCCAACGCTGCCCGA-<br/> GATGCGCCGCGTGCGGCTGCTGGAGATGGCGGACGCGATGGATATGTTCTGCCAAGGGTTGG </p> |

TTTGCGCATTACAGTTCTCCGCAAGAATTGATTGGCTCCAATTCTTGGAG-  
TGGTGAATCCGTTAGCGAGGTGCCGCCGGCTTCCATTCAGGTCGAGGTGGCCCCGGCTCCATGC  
ACCGCGACGCAACGCGGGGAGGCAGACAAGGTATAGGGCGGGCGCC-  
TACAATCCATGCCAACCCGTTCCATGTGCTCGCCGAGGCGGCATAAATCGCCGTGACGATCAG  
CGGTCCAGTGATCGAAGTTAGGCTGGTAAGAGCCGCGAGCGATCCTTGAA-  
GCTGTCCCTGATGGTCGTACCTGCCTGGACAGCATGGCCTGCAACGCGGGCATCCCGA  
TGCCGCCGGAAGCGAGAAGAATCATAATGGGGAAGGCCATCCAGCCTCGCGTCGCGAAC-  
GCCAGCAAGACGTAGCCAGCGCGTCGGCCGCCATGCCGGCGATAATGGCCTGCTTCTCGCC  
GAAACGTTTGGTGGCGGGACCAGTGACGAAGGCTTGAGCGAGGGCGTGCAAGATTCCGAA-  
TACCGCAAGCGACAGGCCGATCATCGTCGCGCTCCAGCGAAAGCGGTCTCGCCGAAAATGA  
CCCAGAGCGCTGCCGGCACCTGTCTACGAGTTGCATGATAAAGAAGACAG-  
TCATAAGTGCGGCGACGATAGTCATGCCCCGCGCCACCGBAAGGAGCTGACTGGGTTGAAG  
GCTCTCAAGGGCATCGGTCGAGATCCCGGTGCCTAATGAGTGAGCTAACTACATTAATT-  
GCGTTGCGCTCACTGCCCGCTTTCAGTCGGGAAACCTGTCTGCCAGCTGCATTAATGAATC  
GGCCAACGCGCGGGGAGAGGCGGTTTGCCTATTGGGCGCCAGGGTGGTTTTCTTTTCAC-  
CAGTGAGACGGGCAACAGCTGATTGCCCTTCACCGCTGGCCCTGAGAGAGTTGCAGCAAGC  
GGTCCACGCTGGTTTGGCCGAGCAGGCGAAAATCCTGTTTATGTTGGTTAACGGCGGGATA-  
TAACATGAGCTGTCTTCGGTATCGTCGTATCCCACTACCGAGATATCCGCACCAACGCGCAGC  
CCGGAATCGGTAATGGCGCGCATTGCGCCAGCGCCATCTGATCGTTGGCAACCAGCATCG-  
CAGTGGAACGATGCCCTCATTACGATTTGCATGGTTTGTGAAAACCGGACATGGCACTCC  
AGTCGCCTTCCCGTTCGCTATCGGCTGAATTTGATTGCGAGTGAGA-  
TATTTATGCCAGCCAGCCAGACGACGCGCCGAGACAGAACTTAATGGGCCCCGCTAACAG  
CGCGATTTGCTGGTGACCAATGCGACCAGATGCTCCACGCCCAGTCGCGTAC-  
CGTCTTCATGGGAGAAAATAATACTGTTGATGGGTGTCTGGTCAGAGACATCAAGAAATAAC  
GCCGGAACATTAGTGACGGCAGCTTCCACAGCAATGGCATCCTGGTCATCCAGCGGA-  
TAGTTAATGATCAGCCCACTGACGCGTTGCGCGAGAAGATTGTGCACCGCCGCTTTACAGGCT  
TCGACGCCGCTTCGTTCTACCATCGACACCACCGCTGGCACCCAGTTGATCGGCGCGA-  
GATTTAATCGCCGCGACAATTTGCGACGGCGCGTGAGGGCCAGACTGGAGGTGGCAACGCC  
AATCAGCAACGACTGTTTGGCCGCCAGTTGTTGTGCCACGCGGTTGG-  
GAATGTAATTCAGCTCCGCCATCGCCGCTTCCACTTTTTCCCGCGTTTTTCGCAGAAACGTGGCT  
GGCCTGGTTACACACGCGGGAAACGGTCTGATAAGAGACACCGGCATACTCTGCGACATCG-  
TATAACGTTACTGGTTTCACATTCACCACCCTGAATTGACTCTCTTCCGGGCGCTATCATGCCA  
TACCGCGAAAGGTTTTGCGCCATTCGATGGTGTCCGGGATCTCGACGCTCTCCCTTATGAAC-  
GTGTACGGGCTATCTGGCTTTTCGTTGCGC

TTGACAGCTAGCTCAGTCTAGGTATAATACTAGTCCATCTTACCTTTGCATCTC-  
TATCGTTCTCATCTCATCCTAAAGCCCGCGAAAGCGGGCTTTTTTTTAACTGGCGGACGC  
GCAAAAGAGAGGAGACAGAGATGCGTAAAGGAGAAGAACTTTTCACTGGAGTT-  
GTCCCAATTCTTGTGAATTAGATGGTGATGTTAATGGGCACAAATTTTCTGTCAGTGGAGAG  
GGTGAAGGTGATGCAACATACGGAAAACCTTACCCTTAAATTTATTGCACTACTGGAAAAC-  
TACCTGTTCCGTGGCCAACACTTGTCACTACTTTCGGTTATGGTGTTCATGCTTTGCGAGATA  
CCCAGATCACATGAAACAGCATGACTTTTTCAAGAGTGCCATGCCCGAAGGTTACGTACAG-  
GAAAGAACTATATTTTTCAAAGATGACGGGAACTACAAGACACGTGCTGAAGTCAAGTTTGA  
AGGTGATACCCTTGTTAATAGAATCGAGTTAAAAGGTATTGATTTTAAAGAA-  
GATGGAAACATTCTTGGACACAAATTGGAATACAACATACTACACAAATGTATACATCATG  
GCAGACAAACAAAAGAATGGAATCAAAGTTAACTTCAAATTAGACACAACATTGAA-  
GATGGAAAGCGTTCAACTAGCAGACCATTATCAACAAAATACTCCGATTGGCGATGGCCCTGTG  
CTTTTACCAGACAACCATTACCTGTCCACACAATCTGCCCTTTCGAAAGATCCCAACGAAAA-  
GAGAGACCACATGGTCCTTCTTGAGTTTGTAAACCGCTGCTGGGATTACACATGGCATGGATGA  
ACTATACAAAAGGCCTGCAGCAACGACGAAAACCTACGCTGCATCAGTTTAATAAGGA-  
TAAAC-

T500\_SWT (pJ23119  
T500\_SWT-linker A  
(RBS)-GFPmut3b-  
T7term-KanR-(Bla  
Promoter)-ColA  
origin-backbone)

CAGAGCGGCACGGCAAGCAGAGTATACGAGATTCGGTAGCCACCGCTGAGCAATAAC TAGCA  
TAACCCCTTGGGGCTCTAAACGGGTCTTGAGGGGTTTTT GCTGAAACCTCAGGCATTTGA-  
GAAGCACACGGTCACTGCTTCCGGTAGTCAATAAACCGGTAAACCAGCAATAGACATAAG  
CGGCTATTTAAACGACCCTGCCCTGAACCGACGACAAGCTGACGACCGGGTCTCCGCAAGTGG-  
CACTTTTCCGGGAAATGTGCGCGGAACCCCTATTTGTTTATTTTTCTAAATACATTCAAATATG  
TATCCGCTCATGAATTAATTC TAGAAAACTCATCGAGCATCAAATGAAACTG-  
CAATTTATTCATATCAGGATTATCAATACCATATTTTTGAAAAAGCCGTTTCTGTAATGAAGG  
AGAAAACTCACCGAGGCAGTTCCATAGGATGGCAAGATCCTGGTATCGGTCTGCGAT-  
TCCGACTCGTCCAACATCAATAACAACCTATTAATTTCCCTCGTCAAAAAATAAGGTTATCAAG  
TGAGAAATCACCATGAGTGACGACTGAATCCGGTGAGAATGG-  
CAAAAGTTTATGCATTTCTTCCAGACTTGTTCAACAGGCCAGCCATTACGCTCGTCATCAAA

ATCACTCGCATCAACCAACCGTTATTCATTCTGTGATTGCGCCTGAGCGAGACGAAATAC-  
GCGGTCGCTGTTAAAAGGACAATTACAAACAGGAATCGAATGCAACCGGCGCAGGAACACTG-  
CCAGCGCATCAACAATATTTTCACCTGAATCAGGATATTCTTCTAATACCTG-  
GAATGCTGTTTTCCCGGGGATCGCAGTGGTGAGTAACCATGCATCATCAGGAGTACGGATAA-  
AATGCTTGATGGTCGGAAGAGGCATAAATTCCGTCAGCCAGTTTAGTCTGAC-  
CATCTCATCTGTAACATCATTGGCAACGCTACCTTTGCCATGTTTCAGAAACAACCTGGCGC-  
ATCGGGCTTCCCATACAATCGATAGATTGTCGCAC-  
CTGATTGCCCAGACATTATCGCGAGCCATTTATACCATATAAATCAGCATCCATGTTGGAAT-  
TTAATCGCGGCTAGAGCAAGACGTTTCCCGTTGAATATGGCTCATACTCTTCCTTTTTCAA-  
TATTATTGAAGCATTTATCAGGGTTATTGTCTCATGAGCGGATACATATTTGAATGTATTTAGA-  
AAAATAAACAAA TAGGCATGCTAGCGCAGAAACGTCTAGAAGATGCCAGGAGGA-  
TACTTAG-  
CAGAGAGACAATAAGGCCGGAGCGAAGCCGTTTTTCCATAGGCTCCGCCCCCTGACGAACA-  
TCACGAAATCTGACGCTCAAATCAGTGGTGCGAAGAACCCGACAGGACTATAAAGATAC-  
CAGGCGTTTCCCGCTGATGGCTCCCTCTTTCGCTCTCCTGTTCCCGTCTCGGGCGTCCGTTT-  
GTGGTGGAGGCTTTACCCAAATCACCACGTCCCGTTCCGTGTAGACAGTTTCGCTCCAA-  
GCTGGGCTGTGTGCAAGAACCCCCGTTTCAGCCCGACTGCTGCGCCTTATCCGGTAACTATCA-  
TCTTGAGTCCAACCCGGAAGACACGACAAAACGCCACTGGCAGCAGCCATTGGTAACTGA-  
GAATTAGTGGATTTAGATATCGAGAGTCTTGAAGTGGTGGCCTAACAGAGGCTACACTGAAA-  
GGACAGTATTTGGTATCTGCGTCCACTAAAGCCAGTTACCAGGTTAAGCAG-  
TTCCCCAACTGACTTAACCTTCGATCAAACCGCCTCCCCAGGCGGTTTTTTTCGTTTACAGAGCA-  
GGAGATTACGACGATCGTAAAAGGATCTCAAGAAGATCCTTTACGGATTCCCGACAC-  
CATCACTCTAGATTTTCAGTGCAATTTATCTCTTCAAATGTAGCACCTGAAGTCAGCCCCATAC-  
GATATAAGTTGTAATTCTCATGTTAGTCATGCCCCGCGCCCCACCG-  
GAAGGAGCTGACTGGGTTGAAGGCTCTCAAGGGCATCGGTGAGATCCCGGTGCCTAATGAG-  
TGAGCTAACTTACATTAATTGCGTTGCGCTCACTGCCCCGTTTTCCAGTCGGGAAAC-  
CTGTCGTGCCAGCTGCATTAATGAATCGGCCAACGCGCGGGGAGAGGCGGTTTGCGTATTGG-  
GCGCCAGGGTGGTTTTTCTTTTACCAGTGAGACGGGCAACAGCTGATTGCCCTTAC-  
CGCTGGCCCTGAGAGAGTTGCAGCAAGCGGTCCACGCTGGTTTGCCCCAGCAGGCGAAAAT-  
CCTGTTTGATGGTGGTTAACGGCGGGATATAACATGAGCTGCTTTCGGTATCGTCG-  
TATCCCACTACCGAGATGTCCGCACCAACGCGCAGCCCGGACTCGGTAATGGCGCGCATTGC-  
GCCAGCGCCATCTGATCGTTGGCAACCAGCATCGCAGTGGGAACGATGCCCTCATTCAG-  
CATTTGCATGGTTTGTGAAAACCGGACATGGCACTCCAGTCGCCTTCCCGTTCCGCTATCGG-  
CTGAATTTGATTGCGAGTGAGATATTTATGCCAGCCAGCCAGACGCAGACGCGCCGAGA-  
CAGAACTTAATGGGCCCCGCTAACAGCGCGATTTGCTGGTGACCCAATGCGACCAGATGCTCC-  
ACGCCAGTCGCGTACCGTCTTCATGGGAGAAAATAATACTGTTGATGGGTGTCTGGTCAGA-  
GACATAAGAAATAACGCCGGAACATTAGTGCAGGCGAGCTTCCACAGCAATGGCATCCTGGT-  
CATCCAGCGATAGTTAATGATCAGCCCACTGACGCGTTGCGCGAGAAGATTGTGCAC-  
CGCCGCTTTACAGGCTTCGACGCGCTTCGTTCTACCATCGACACCACCAGCTGGCACCCAG-  
TTGATCGGCGCGAGATTTAATCGCCGCGACAATTTGCGACGGCGCGTGCAGGGCCAGACTG-  
GAGGTGGCAACGCCAATCAGCAACGACTGTTTGCCCGCCAGTTGTTGTGCCACGCGGTTGGG-  
AATGTAATTCAGCTCCGCCATCGCCGCTTCCACTTTTTTCCCGCGTTTTTCGCAGAAAC-  
GTGGCTGGCCTGGTTTACCACGCGGGAAACGGTCTGATAAGAGACACCGGCATACTCTGCGA-  
CATCGTATAACGTTACTGGTTTACATTACCAACCCTGAATTGACTCTCTTCCGGGCGC-  
TATCATGCCATACCGCGAAAGGTTTTGCGCCATTTCGATGGTGTCCGGGATCTCGACGCTCTCC-  
CTTATGAAGTCTAACGCTGCTCTGGGCTAACTGTCGCGC

TTGACAGCTAGCTCAGTCCTAGGTATAATACTAGTCCATCTTACCTTTGCATCTC-  
TATCGTTCTCATCTCATCCTAAAGCCCGCCGAAAGGCGGGCTTTTTTTTCTCTTCTATCCTCT-  
AACTCTGAGTAAGATAATGAAGGTAGGTATGTTAACTTTAGAACAGAGGAGATAAA-  
GATGAACATACCTACGAACCTGGCGGCAGCGCAAAAGATGCGTAAAGGAGAAGAAGCTTTCA-  
CTGGAGTTGTCCCAATTCTTGTGTAATTAGATGGTGATGTTAATGGG-  
CACAAATTTCTGTCTAGTGGAGAGGGTGAAGGTGATGCAACATACGGAAAACCTTACCCTTAA-  
ATTTATTTGCACTACTGGAAAACCTACCTGTTCCGTGGCCAAACACTTGTTCAC-  
TACTTTTCGGTTATGGTGTTCAATGCTTTGCGAGATACCCAGATCACATGAAACAGCATGACTT-  
TTTCAAGAGTGCCATGCCCCGAAGGTTACGTACAGGAAAGAACTATATTTTTCAAAGATGAC-  
GGGAACCTACAAGACACGTGCTGAAGTCAAGTTTGAAGGTGATACCCTTGTTAATAGAATCGA-  
GTTAAAAGGTATTGATTTTAAAGAAGATGGAAACATTCTTGGACACAAAATTGGAATACAAC-  
TATAACTCACACAATGTATACATCATGGCAGACAAACAAAAGAATGGAATCAAAGTTAACTT-  
CAAAATTAGACACAACATTGAAGATGGAAGCGTTCAACTAGCAGACCATTATCAACAAAAA-  
TACTCCGATTGGCGATGGCCCTGTCTTTTACCAGACAACCATTACCTGTCCACACAATCTGCC-  
CTTTCGAAAGATCCCAACGAAAAGAGAGACCACATGGTCCTTCTTGAGTTTGTAAAC-  
CGCTGCTGGGATTACACATGGCATGGATGAACTATACAAAAGCCTGCAGCAAACGACGAAA

T500\_SWT\_THS\_A  
(pJ23119)-  
T500\_SWT-linker B-  
THS\_A(RBS)-linker  
A-GFPmut3b-  
T7term-KanR-(Bla  
Promoter)-ColA  
origin-backbone)

ACTACGCTGCATCAGTTTAATAA GATAAACCCAGAGCGGCACGGCAAGCAGAGTATACGA-  
 GAT-  
 TCGGTAGCCACCGCTGAGCAATAAAGTAGCATAACCCCTTGGGGCCTCTAAACGGGTCTTGAGG  
 GGTTTTTT GCTGAAACCTCAGGCATTTGAGAAGCACACGGTCACACTGCTTCCGGTAGTCAA-  
 TAAACCGGTAAACCAGCAATAGACATAAGCGGCTATTTAACGACCCTGCCCTGAACCGACGA  
 CAAGCTGACGACCGGGTCTCCGCAAGTGGCACTTTTCGGGGAAATGTGCGCG-  
 GAACCCCTATTTGTTTATTTTTCTAAATACATTCAAATATGTATCCGCTCATGAATTAATTCTT  
 AGAAAACTCATCGAGCATCAAATGAACTGCAATTTATTCATATCAGGATTATCAATAC-  
 CATATTTTTGAAAAAGCCGTTTCTGTAATGAAGGAGAAAACTCACCGAGGCAGTTCCATAGGA  
 TGGCAAGATCCTGGTATCGGTCTGCGATTCCGACTCGTCCAACATCAATACAAC-  
 CTATTAATTTCCCCTCGTCAAAAATAAGGTTATCAAGTGAGAAATCACCATGAGTGACGACTG  
 AATCCGGTGAGAATGGCAAAAGTTTATGCATTTCTTTCCAGACTT-  
 GTTCAACAGGCCAGCCATTACGCTCGTCATCAAAATCACTCGCATCAACCAACCGTTATTCA  
 TTCGTGATTGCGCTGAGCGAGACGAAATAC-  
 GCGGTCGCTGTTAAAAGGACAATTACAACAGGAATCGAATGCAACCGGCGCAGGAACACTG  
 CCAGCGCATCAACAATATTTTCACTGAATCAGGATATTCTTCTAATACCTG-  
 GAATGCTGTTTTCCCGGGGATCGCAGTGGTGAGTAACCATGCATCATCAGGAGTACGGATAA  
 AATGCTTGATGGTCGGAAGAGGCATAAATTCCGTCAGCCAGTTTAGTCTGAC-  
 CATCTCATCTGTAAACATCATTGGCAACGCTACCTTTGCCATGTTTCAGAAACAACCTTGCGCG  
 ATCGGGCTTCCCATACAATCGATAGATTGTCGCAC-  
 CTGATTGCCCCGACATTATCGCGAGCCCATTTATACCCATATAAATCAGCATCCATGTTGGAAT  
 TTAATCGCGGCCTAGAGCAAGACGTTTCCCGTTGAATATGGCTCATACTCTTCCTTTTTTCAA-  
 TATTATTGAAGCATTATCAGGGTTATTGTCTCATGAGCGGATACATATTTGAATGTATTTAGA  
 AAAATAAAACAAATAGGCATGCTAGCGCAGAAACGTCCTAGAAGATGCCAGGAGGA-  
 TACTTAG-  
 CAGAGAGACAATAAGGCCGGAGCGAAGCCGTTTTTCCATAGGCTCCGCCCCCTGACGAACA  
 TCACGAAATCTGACGCTCAAATCAGTGGTGGCGAAACCCGACAGGACTATAAAGATAC-  
 CAGGCGTTTTCCCCCTGATGGCTCCCTCTTGCGCTCTCTGTTCCCGTCTGCGGCGTCCGTTGT  
 GTGGTGGAGGCTTTACCCAAATCACCACGTCCCGTTCCGTGTAGACAGTTTCGCTCCAA-  
 GCTGGGCTGTGTGCAAGAACCCCCCGTTACGCCCCGACTGCTGCGCCTTATCCGGTAACTATCA  
 TCTTGAGTCCAACCCGGAAGACACGACAAAACGCCACTGGCAGCAGCCATTGGTAACTGA-  
 GAATTAGTGGATTTAGATATCGAGAGTCTTGAAGTGGTGGCCTAACAGAGGCTACACTGAAA  
 GGACAGTATTTGGTATCTGCGTCCACTAAAGCCAGTTACCAGGTTAAGCAG-  
 TTCCCCAACTGACTTAACCTTCGATCAAACCGCCTCCCCAGGCGGTTTTTTTCGTTTACAGAGCA  
 GGAGATTACGACGATCGTAAAAGGATCTCAAGAAGATCCTTTACGGATTCCCGACAC-  
 CATCACTCTAGATTTTCACTGCAATTTATCTCTTCAAATGTAGCACCTGAAGTCAGCCCCATAC  
 GATATAAGTTGTAATTCTCATGTTAGTCATGCCCGCGACCCACCG-  
 GAAGGAGCTGACTGGGTTGAAGGCTCTCAAGGGCATCGGTGCGAGATCCCGGTGCCTAATGAG  
 TGAGCTAACTTACATTAATTGCGTTGCGTCACTGCCGCTTTCCAGTCGGGAAAC-  
 CTGTCGTGCCAGCTGCATTAATGAATCGGCCAACGCGCGGGGAGAGGCGGTTTTCGCTATTGG  
 GCGCCAGGGTGGTTTTTCTTTTACCAGTGAGACGGGCAACAGCTGATTGCCCTTAC-  
 CGCTGGCCCTGAGAGAGTTGCAGCAAGCGGTCCACGCTGGTTTGGCCCAGCAGGCGAAAAT  
 CCTGTTTGATGGTGGTTAACGGCGGGATATAACATGAGCTGTCTTCGGTATCGTCG-  
 TATCCCACTACCGAGATGTCCGCACCAACGCGCAGCCCGGACTCGGTAATGGCGCGCATTGC  
 GCCAGCGCCATCTGATCGTTGGCAACCAGCATCGCAGTGGGAACGATGCCCTCATTCAG-  
 CATTTGCATGGTTTGTGAAAACCGGACATGGCACTCCAGTCGCCTTCCCGTTCCGCTATCGG  
 CTGAATTTGATTGCGAGTGAGATATTTATGCCAGCCAGCCAGACGACGCGCCGAGA-  
 CAGAACTTAATGGGCCCCTAACAGCGCGATTTGCTGGTGACCAATGCGACCAGATGCTCC  
 ACGCCAGTCGCGTACCGTCTTCATGGGAGAAAATAATACTGTTGATGGGTGTCTGGTCAGA-  
 GACATCAAGAAATAACGCCGGAACATTAGTGCAGGCAGCTTCCACAGCAATGGCATCCTGGT  
 CATCCAGCGGATAGTTAATGATCAGCCCACTGACGCGTTGCGCGAGAAGATTGTGCAC-  
 CGCCGCTTTACAGGCTTCGACGCCGCTTCGTTCTACCATCGACACCACCACGCTGGCACCCAG  
 TTGATCGGCGCGAGATTTAATCGCCGCGACAATTTGCGACGGCGCGTGCAGGGCCAGACTG-  
 GAGGTGGCAACGCCAATCAGCAACGACTGTTTGCCCGCCAGTTGTTGTGCCACGCGGTTGGG  
 AATGTAATTCAGCTCCGCCATCGCCGCTTCCACTTTTTTCCCGCGTTTTTCGCAGAAAC-  
 GTGGCTGGCCTGGTTACACACGCGGGAACGGTCTGATAAGAGACACCGGCATACTCTGCGA  
 CATCGTATAACGTTACTGGTTTACATTACACCCCTGAATTGACTCTCTTCCGGGCGC-  
 TATCATGCCATACCGCGAAAGGTTTTGCGCCATTCGATGGTGTCCGGGATCTCGACGCTCTCC  
 CTTATGAAGTCTAACGCTGCTCTGGGCTAACTGTCCGCG

TetO\_GFP (pT7-  
 TetO\_ (Weiss RBS)-  
 GFPmut3b T7term-

TAATACGACTCACTATAGG TCTATCATTGATAGGGTTT ATAAAGAGGAGAAATTAA-  
 GCATGCGTAAAGGAGAAGAACTTTTCACTGGAGTTGTCCCAATTCTTGTTGAATTAGATGGTG

KanR (Bla Pro-  
moter) ColA origin-  
backbone)

ATGTTAATGGGCACAAATTTTCTGTCAGTGGAGAGGGTGAAGGTGATGCAACAT-  
ACGGAAAACCTACCCTTAAATTTATTTGCACTACTGGAAAACCTACCTGTTCCGTGGCCAACAC  
TTGTCACTACTTTTCGGTTATGGTGTTCATGCTTTGCGAGATACCCAGATCACATGAAACAG-  
CATGACTTTTTCAAGAGTGCCATGCCCGAAGGTTACGTACAGGAAAGAAGCTATATTTTTCAA  
GATGACGGGAACTACAAGACACGTGCTGAAGTCAAGTTTGAAGGTGATACCCTTGTTAA-  
TAGAATCGAGTTAAAAGGTATTGATTTTAAAGAAGATGGAAACATTCTTGGACACAAATTGG  
AATACAACCTATAACTCACACAATGTATACATCATGGCAGACAAACAAAA-  
GAATGGAATCAAAGTTAACTTCAAAATTAGACACAACATTGAAGATGGAAGCGTTCAACTAG  
CAGACCATTATCAACAAAATACTCCGATTGGCGATGGCCCTGTCCTTTTACCAGACAAC-  
CATTACCTGTCCACACAATCTGCCCTTTCGAAAAGATCCCAACGAAAAGAGAGACCACATGGTC  
CTTCTTGAGTTTGTAACCGCTGCTGGGATTACACATGGCATGGATGAACTATA-  
CAAAAGGCCTGCAGCAAACGACGAAAACCTACGCTGCATCAGTTTAATAA GATAAACCAAGAGC  
GGCACGGCAAGCAGAGTATACGAGATTCCGTAGCCACCGCTGAGCAATAAC TAG-  
CATAACCCCTTGGGGCCTCTAAACGGGTCTTGAGGGGTTTTT GCTGAAACCTCAGGCATTTG  
AGAAGCACACGGTCACACTGCTTCCGGTAGTCAATAAACCGGTAAACCAGCAATAGA-  
CATAA-  
GCGGCTATTTAACGACCCCTGCCCTGAACCGACGACAAGCTGACGACCGGGTCTCCGCAAGTG  
GCACTTTTCGGGGAAATGTGCGCGGAACCCCTATTTGTTTATTTTTCTAAATACATTCAAA-  
TATGTATCCGCTCATGAATTAATTC TTAGAAAACTCATCGAGCATCAAAATGAACTGCAATT  
TATTCATATCAGGATTATCAATACCATATTTTTGAAAAAGCCGTTTCTGTAATGAAGGA-  
GAAAACCTCACCGAGGCAGTTCCATAGGATGGCAAGATCCTGGTATCGGTCTGCGATTCCGACT  
CGTCCAACATCAATACAACCTATTAATTTCCCCTCGTCAAAAATAAGGTTATCAAGTGA-  
GAAATCACCATGAGTGACGACTGAATCCGGTGAGAATGGCAAAAGTTTATGCATTTCTTTCCA  
GACTTGTCAACAGGCCAGCCATTACGCTCGTCATCAAAATCACTCGCATCAACCAAAC-  
CGTTATTCATTCTGATTGCGCCTGAGCGAGACGAAATACGCGGTGCGTGTTAAAAGGACAAT  
TACAAACAGGAATCGAATGCAACCGGCGCAGGAACACTGCCAGCGCATCAACAA-  
TATTTTCACCTGAATCAGGATATCTTCTAATACCTGGAATGCTGTTTTCCCGGGGATCGCAGT  
GGTGAGTAACCATGCATCATCAGGAGTACGGATAAAATGCTTGATGGTCCGAA-  
GAGGCATAAATTCGCTCAGCCAGTTTAGTCTGACCATCTCATCTGTAACATCATTGGCAACGC  
TACCTTTGCCATGTTTCAGAAACAACTCTGGCGCATCGGGCTTCCCATACAATCGATA-  
GATTGTGCGACCTGATTGCCCGACATTATCGCGAGCCATTTATACCCATATAAATCAGCATC  
CATGTTGGAATTTAATCGCGGCCTAGAGCAAGACGTTTCCCGTTGAATATGGCTCAT-  
ACTCTTCCTTTTTCAATATTATTGAAGCATTATCAGGGTTATTGTCTCATGAGCGGATACATA  
TTTGAATGTATTTAGAAAAATAAACAAATAGGCATGCTAGCGCAG AAACGTCCTAGAA-  
GATGCCAGGAGGATACTTAGCAGAGAGACAATAAGGCCGGAGCGAAGCCGTTTTTCCATAGG  
CTCCGCCCCCTGACGAACATCACGAAATCTGACGCTCAAATCAG-  
TGGTGGCGAAACCCGACAGGACTATAAAGATACAGGCGTTTCCCCCTGATGGCTCCCTCTTG  
CGCTCTCCTGTTCCCGTCTGCGGCTCCGTGTTGTTGGTGAGGCTTTACCCAATCACCAC-  
GTCCCGTTCCGTGTAGACAGTTTCGCTCCAAGCTGGGCTGTGTGCAAGAACCCCCGTTACGCC  
CGACTGCTGCGCCTTATCCGGTAACATCATCTTGAGTCCAACCCGGAAGACAC-  
GACAAAACGCCACTGGCAGCAGCCATTGGTAACTGAGAATTAGTGGATTAGATATCGAGAG  
TCTTGAAGTGGTGGCCTAACAGAGGCTACACTGAAAGGACAGTATTTGG-  
TATCTGCGCTCCACTAAAGCCAGTTACCAGGTTAAGCAGTTCCCCAACTGACTTAACCTTCGA  
TCAAACCGCCTCCCCAGGCGGTTTTTTTCGTTTACAGAGCAGGAGATTACGACGATCG-  
TAAAAGGATCTCAAGAAGATCCTTTACGGATTCCCGACACCA TCACTCTAGATTTCAGTGCAA  
TTTATCTCTTCAAATGTAGCACCTGAAGTCAGCCCCATACGATATAAGTT-  
GTAATTCTCATGTTAGTCATGCCCCGCGCCACCGGAAGGAGCTGACTGGGTTGAAGGCTCTC  
AAGGGCATCGGTGAGATCCCGGTGCCTAATGAGTGAGCTAACTTACATTAATTGCGTT-  
GCGCTCACTGCCCCGTTTTCCAGTCGGGAAACCTGTCGTGCCAGCTGCATTAATGAATCGGCCA  
ACGCGCGGGGAGAGGCGGTTTTGCGTATTGGGCGCCAGGGTGGTTTTTCTTTTACCAGTGA-  
GACGGGCAACAGCTGATTGCCCTTACCCGCTGGCCCTGAGAGAGTTGCAGCAAGCGGTCCA  
CGCTGGTTTGCCCCAGCAGGCGAAAATCCTGTTTGATGGTGGTTAACGGCGGGGATA-  
TAACATGAGCTGTCTTCGGTATCGTCGTATCCCACTACCGAGATGTCCGCACCAACGCGCAGC  
CCGGA CTGGTAATGGCGCGCATTGCGCCAGCGCCATCTGATCGTTGGCAACCAGCATCG-  
CAGTGGGAACGATGCCCTCATTACGATTTTGCATGGTTTGTGAAAACCGGACATGGCACTCC  
AGTCGCCTTCCCGTTCCGCTATCGGCTGAATTTGATTGCGAGTGAGA-  
TATTTATGCCAGCCAGCCAGACGACGCGCCGAGACAGAACTTAATGGGCCCCGCTAACAG  
CGCGATTTGCTGGTGACCCAATGCGACCAGATGCTCCACGCCCAGTCGCGTAC-  
CGTCTTCATGGGAGAAAATAATACTGTTGATGGGTGTCTGGTCAGAGACATCAAGAAATAAC  
GCCGGAACATTAGTGCAGGCAGCTTCCACAGCAATGGCATCCTGGTCATCCAGCGGA-  
TAGTTAATGATCAGCCCACTGACGCGTTGCGCGAGAAGATTGTGCACCGCCGCTTTACAGGCT



TCGACGCCGCTTCGTTCTACCATCGACACCACCACGCTGGCACCCAGTTGATCGGCGCGA-  
GATTTAATCGCCGCGACAATTTGCGACGGCGCGTGCAGGGCCAGACTGGAGGTGGCAACGCC  
AATCAGCAACGACTGTTTGCCCGCCAGTTGTTGTGCCACGCGGTTGG-  
GAATGTAATTCAGCTCCGCCATCGCCGCTTCCACTTTTTCCCGCGTTTTCGCAGAAACGTGGCT  
GGCCTGGTTCACCACGCGGGAAACGGTCTGATAAGAGACACCGGCATACTCTGCGACATCG-  
TATAACGTTACTGGTTTCACATTACCCACCTGAATTGACTCTCTCCGGGCGCTATCATGCCA  
TACCGCGAAAGGTTTTGCGCCATTTCGATGGTGTCCGGGATCTCGAC-  
GCTCTCCCTTATGAAGTCTAACGCTGCTCTGGGCTAACTGTCGCGC

TTGACAGCTAGCTCAGTCCTAGGTATAATACTAGTCCATCTTACCTTTGCATCTC-  
TATCGTTCTCATCTCATCCTAAAGCCCCGCCGAAAGGCGGGCTTTTTTTAACCTGGCGGCAGC  
GCAAAAGAGAGGAGACAGAGATGTCTAGATTAGATAAAAGTAAAGTGATTAACAGCGCATT-  
AGAGCTGCTTAATGAGGTCGGAATCGAAGGTTTAAACAACCCGTAAACTCGCCAGAAAGCTAG  
GTGTAGAGCAGCCTACATTGTATTGGCATGTAAAAAATAAGCGGGCTTTGCTCGAC-  
GCCTTAGCCATTGAGATGTTAGATAGGCACCATACTACTTTTGCCTTTAGAAGGGGAAAGC  
TGGCAAGATTTTTTACGTAATAACGCTAAAAGTTTTAGATTGCTTTACT-  
AAGTCATCGGATGGAGCAAAAGTACATTTAGGTACACGGCCTACAGAAAAACAGTATGAAA  
CTCTCGAAAATCAATTAGCCTTTTTATGCCAACAAGGTTTTTCACTAGAGAATGCATTA-  
TATGCACTCAGCGCTGTGGGGCATTTTACTTTAGGTTGCGTATTGGAAGATCAAGAGCATCAA  
GTCGCTAAAGAAGAAAGGGAAACACCTACTACTGATAGTATGCCGCCATTATTACGACAAGC-  
TATCGAATTATTTGATCACCAAGGTGCAGAGCCAGCCTTCTTATTCGGCCTTGAATTGATCATA  
TGCGGATTAGAAAAACAACCTAAATGTGAAAGTGGGTCTAGGCCTGCAGCAAACGAC-  
GAAAACTACGCTGCATCAGTTTAATAAGATAAAACCAGAGCGGCACGGCAAGCAGAGTATACG  
AGATTTCGGTAGCCACCGCTGAGCAATAACTAGCATAACCCCTTGGGGCCTCTAAAC-  
GGGTCTTGAGGGGTTTTTCTGTAACCTCAGGCATTTGAGAAGCACACGGTCACACTGCTTC  
CGGTAGTCAATAAACCGGTAAACCAGCAATAGACATAAGCGGCTATTTAAC-  
GACCCTGCCCTGAACCGACGACCGGGTCATCGTGGCCGATCTTGCGGCCCTCGGCTTGAAC  
GAATTGTTAGACAATTATTGCGGACTACCTTGGTGATCTCGCCTTTCACGTAGTG-  
GACAAATTCTTCCAAGTATGACGGGCTGATACTGGGCCGGCAGGCGCTCCATTGCCAGTCGG-  
CAGCGACATCCTTCGGCGCGATTTTGCCGGTTACTGCGCTGTACCAAATGCGGGACAACGTAA  
GCACTACATTTTCGCTCATCGCCAGCCAGTCGGGCGGCGAGTTCCA-  
TAGCGTTAAGGTTTCATTTAGCGCCTCAAATAGATCCTGTTACGGAACCGGATCAAAGAGTTC  
CTCCGCCGCTGGACCTACCAAGGCAACGCTATGTTCTCTTGCTTTTGTGAGCAAGA-  
TAGCCAGATCAATGTCGATCGTGGCTGGCTCGAAGATACCTGCAAGAATGTCATTGCGCTGCC  
ATTCTCCAAATTGCAGTTCGCGCTTAGCTGGATAACGCCACGGAATGATGTCGTCGTG-  
CACAACAATGGTGACTTCTACAGCGCGGAGAATCTCGCTCTCTCCAGGGGAAGCCGAAGTTTC  
CAAAAGTTCGTTGATCAAAGCTCGCCGCTGTTTTCATCAAGCCTTACGGTCACCGTAAAC-  
CAGCAAATCAATATCACTGTGTGGCTTCAGGCCACTCCACTGCGGAGCCGTACAAATGTAC  
GGCCAGCAACGTCGGTTCGAGATGGCGCTCGATGACGCCAACTACCTCTGATAGTTGAG-  
TCGATACTTCGGCGATCACCGCTTCCCTCATACTCTTCTTTTCAATATTATTGAAGCATTAT  
CAGGGTTATTGTCTCATGAGCGGATACATATTTGAATGTATTTAGAAAAATAAACAAA-  
TAGCTAGCTCACTCGGTGCTACGCTCCGGGCGTGAGACTGCGGCGGGCGCTGCGGACACAT  
ACAAAGTTACCCACAGATTCCGTTGGATAAGCAGGGGACTAACATGTGAGGCAAAACAG-  
CAGGGCCGCGCCGGTGGCGTTTTTCCATAGGCTCCGCCCTCCTGCCAGAGTTCACATAAACAG  
ACGCTTTTCCGGTGATCTGTGGGAGCCGTGAGGCTCAACCATGAATCTGACAGTAC-  
GGGCGAAACCCGACAGGACTTAAAGATCCCCACCGTTTCCGGCGGGTTCGCTCCCTCTTGCGCT  
CTCTGTTCCGACCTGCCGTTTACCGGATACCTGTTCCGCCTTCTCCCTTACGG-  
GAAGTGTGGCGCTTTCTCATAGCTCACACACTGGTATCTCGGCTCGGTGTAGGTCGTTGCGCTC  
CAAGCTGGGCTGTAAGCAAGAACTCCCGTTTACGCCCAGTCTGTCGCCTTATCCGG-  
TAACTGTTCACTTGAGTCCAACCCGGAAGACAGGTAACCGCCACTGGCAGCAGCCATTG  
GTAAGTGGGAGTTTCGAGAGGATTTGTTTAGCTAAACACGCGGTTGCTCTT-  
GAAGTGTGCGCCAAAGTCCGGCTACACTGGAAGGACAGATTTGGTTGCTGTGCTCTGCGAAA  
GCCAGTTACCACGGTTAAGCAGTTCCTCAACTGACTTAACCTTCGATCAAACAC-  
CTCCCCAGGTGGTTTTTTCGTTTACAGGGGCAAAAGATTACGCGCAGAAAAAAGGATCTCAAG  
AAGATCCTTTGATCTTTTCTACTGAACCGCTCTAGATTTTCAGTG-  
CAATTTATCTCTTCAAATGTAGCACCTGAAGTCAGCCCCATACGATATAAGTTGTAATTCTCAT  
GTTAGTCATGCCCCGCGCCACCGGAAGGAGCTGACTGGGTTGAAGGCTCTCAAGGG-  
CATCGGTCGAGATCCCGGTGCCTAATGAGTGAGCTAACTTACATTAATTGCGTTGCGCTCACT  
GCCCCGTTTCCAGTCGGGAAACCTGTGTCGTCAGCTGCATTAATGAATCGGCCAAC-  
GCGCGGGGAGAGGCGGTTTTGCGTATTGGGCGCCAGGGTGGTTTTTCTTTTACCAGTGAGACG  
GGCAACAGCTGATTGCCCTTACCAGCCTGGCCCTGAGAGAGTTGCAGCAAGCGGTCCAC-  
GCTGGTTTGCCCCAGCAGGCGAAAATCCTGTTTGATGGTGGTTAACGGCGGGATATAACATGA

J23119\_T500\_SWT\_  
TetR (pJ23119)-  
T500\_SWT-linker A-  
(RBS)-TetR-T7term-  
SpecR (Bla Pro-  
moter)-CloDF13  
origin-backbone)

GCTGTCTTCGGTATCGTCGTATCCCACTACCGAGATGTCCGCACCAACGCGCAGCCCG-  
GACTCGGTAATGGCGCGCATTGCGCCCAGCGCCATCTGATCGTTGGCAACCAGCATCGCAGTG  
GGAACGATGCCCTCATTACAGCATTTGCATGGTTTGTGAAAACCGGACATGGCACTCCAG-  
TCGCCTTCCCGTTCCGCTATCGGCTGAATTTGATTGCGAGTGAGATATTTATGCCAGCCAGCC  
AGACGCAGACGCGCCGAGACAGAACTTAATGGGCCCCGCTAACAGCGCGATTT-  
GCTGGTGACCCAATGCGACCAGATGCTCCACGCCAGTCGCGTACCGTCTTCATGGGAGAAA  
ATAATACTGTTGATGGGTGCTGGTCAGAGACATCAAGAAATAACGCCGGAACATTAGTG-  
CAGGCAGCTTCCACAGCAATGGCATCCTGGTCATCCAGCGGATAGTTAATGATCAGCCCACTG  
ACGCGTTGCGCGAGAAGATTGTGCACCGCCGCTTTACAGGCTTCGACGCCGCTTCGTTCTAC-  
CATCGACACCACCACGCTGGCACCCAGTTGATCGGCGCGAGATTTAATCGCCGCGACAATTTG  
CGACGGCGCGTGCAGGGCCAGACTGGAGGTGGCAACGCCAATCAGCAACGACTGTTT-  
GCCCCGCCAGTTGTTGTGCCACGCGGTTGGGAATGTAATTCAGCTCCGCCATCGCCGCTTCCAC  
TTTTTCCCGCGTTTTTCGAGAAACGTGGCTGGCCTGGTTCACCACGCGGGAAACGGTCTGA-  
TAAGAGACACCGGCATACTCTGCGACATCGTATAACGTTACTGGTTTACATTACACCACCTG  
AATTGACTCTCTTCCGGGCGCTATCATGCCATACCGCGAAAGGTTTT-  
GCGCCATTTCGATGGTGTCCGGGATCTCGACGCTCTCCCTTATGAGACTCAGCAAGATTTCGTGT  
AGTGGCGAGTGCGC

TAATACGACTCACTATAGG GATACACATAGAATCATGTGTATGGCGGGCTTTAGGATGA-  
GATGAGAACGATAGAGATGCAAAGGTAAGATGG TAGCATAACCCCTTGGGGCCTCTAAACGG  
GTCTTGAGGGGTTTTTTG CTGAAAGGAGGAACTATATCCGGATATCCCGCAAGAGGCCCGG-  
CAGTACCGGCATAACCAAGCCTATGCCTACAGCATCCAGGGTGACGGTGCCGAGGATGACGA  
TGAGCGCATTGTTAGATTTTACACACGGTGCCTGACTGCGTTAGCAATTTAACTGTGA-  
TAAACTACCGCATTAAGCTTATCGATGATAAGCTGTCAAACATGAGAATTCCTGAAGACGAA  
AGGGCCTCGTGATACGCCTATTTTTATAGGTTAATGTCATGATAATAATGGTTTCTTAGAC-  
GTCAGGTGGCACTTTTCGGGGAAATGTGCGCGGAACCCCTATTTGTTTATTTTCTAAATACAT  
TCAAATATGTATCCGCTCATGAGACAAT AACCTGATAAATGCTTCAATAA-  
TATTGAAAAAGGAAGAGT ATGAGTATTCAACATTTCCGTGTCGCCCTTATTCCTTTTTTGCGG  
CATTTTGCTTCTCTGTTTTTGCTCACCCAGAAACGCTGGTGAAAGTAAAGATGCTGAA-  
GATCAGTTGGGTGCACGAGTGGGTACATCGAAGTGGATCTCAACAGCGGTAAGATCCTTGA  
GAGTTTTCGCCCCGAAGAACGTTTTCCAATGATGAGCACTTTTAAAGTTCTGC-  
TATGTGGCGCGGTATTATCCCGTGTGACGCCGGGCAAGAGCAACTCGGTGCGCGCATACACT  
ATTCTCAGAATGACTTGGTTGAGTACTACCAAGTCACAGAAAAGCATCTTACGGATGG-  
CATGACAGTAAGAGAATTATGCAGTGCTGCCATAACCATGAGTGATAACACTGCGGCCAACT  
TACTTCTGACAACGATCGGAGGACCGAAGGAGCTAACCGCTTTTTTGACAACATGGGG-  
GATCATGTAACTCGCCTTGATCGTTGGGAACCGGAGCTGAATGAAGCCATACCAAACGACGA  
GCGTGACACCACGATGCCTGCAGCAATGGCAACAACGTTGCGCAAATTAAGTGGCGAAC-  
TACTTACTAGCTTCCCGCAACAATTAATAGACTGGATGGAGGCGGATAAAGTTGCGAGGAC  
CACTTCTGCGCTCGGCCCTCCGGCTGGCTGTTTTATTGCTGATAAATCTG-  
GAGCCGGTGAGCGTGGGTCTCGCGGTATCATTGCAGCACTGGGGCCAGATGGTAAGCCCTCC  
CGTATCGTAGTTATCTACACGACGGGGAGTCAGGCAACTATGGATGAACGAAATAGA-  
CAGATCGCTGAGATAGGTGCCTCACTGATTAAGCATTGGTAA CTGTCAGACCAAGTTTACTCA  
TATATACTTTAGATTGATTTAAACTTCATTTTTTAATTTAAAAGGATCTAGGTGAA-  
GATCCTTTTTGATAATCTCATGACCAAAATCCCTTAACGTGAGTTTTCGTTCCACTGAGCGTCA  
GACCCGTAGAAAAGATCAAAGGATCTTC TTGAGATCCTTTTTTTCTGCGCG-  
TAATCTGCTGCTTGCAAACAAAAAAACCACCGCTACCAGCGGTGGTTTGTGTTGCCGGATCAAG  
AGCTACCAACTCTTTTTCCGAAGGTAAGTGGCTTCAGCAGAGCGCAGATACCAA-  
TACTGTCTTCTAGTGTAGCCGTAGTTAGGCCACCACTTCAAGAACTCTGTAGCACCGCCTAC  
ATACCTCGCTCTGCTAATCCTGTTACCAGTGGCTGCTGCCAGTGGCGA-  
TAAGTCGTGTCTTACCGGGTTGGACTCAAGACGATAGTTACCGGATAAGGCGCAGCGGTGCG  
GCTGAACGGGGGGTTCGTGCACACAGCCCAGCTTGGAGCGAACGACCTACACCGAACTGA-  
GA-

TACCTACAGCGTGAGCTATGAGAAAGCGCCACGCTTCCCGAAGGGAGAAAGGCGGACAGGTA  
TCCGGTAAGCGGCAGGGTCGGAACAGGAGAGCGCACGAGGGAGCTTCCAGGGGGAAAC-  
GCCTGGTATCTTTATAGTCTGTGCGGTTTCGCCACCTCTGACTTGAGCGTTCGATTTTTGTGAT  
GCTCGTCAGGGGGGCGGAGCCTATGGAAAACGCCAGCAACGCGGCCTTTTTTAC-  
GGTTCCTGGCCTTTTTGCTGGCCTTTTTGCTCACATGTTCTTTCTGCGTTATCCCTGATTCTGTG  
GATAACCGTATTACCGCCTTTGAGTGAGCTGATACCGCTCGCCGACGCCGAACGACCGAGCG-  
CAGCGAGTCAGTGAGCGAGGAAGCGGAAGAGCGCCTGATGCGGTATTTTCTCCTTACGCATC  
TGTGCGGTATTTACACCGCATATATGGTGCACCTCTCAGTACAATCTGCTCTGATGCCG-  
CATAGTTAAGCCAGTATACACTCCGCTATCGCTACGTGACTGGGTGATGGCTGCGCCCCGACA  
CCCGCCAACACCCGCTGACGCGCCCTGACGGGCTTGTCTGCTCCCGGCATCCGCTTACAGA-  
CAAGCTGTGACCGTCTCCGGGAGCTGCATGTGTCAGAGGTTTTACCGTCATCACCGAAACGC

T500\_SWT\_trigger  
(pT7-  
T500\_SWT\_trigger-  
T7term-(Bla Pro-  
moter)-AmpR-  
pBR322 origin-back-  
bone)

GCGAGGCAGCTGCGGTAAAGCTCATCAGCGTGGTCGTGAAGCGAT-  
 TCACAGATGTCTGCCTGTTTCATCCGCGTCCAGCTCGTTGAGTTTCTCCAGAAGCGTTAATGTCT  
 GGCTTCTGATAAAGCGGGCCATGTTAAGGGCGGTTTTTTCCTGTTTGGTCAC-  
 TGATGCCTCCGTGTAAGGGGGATTCTGTTTCATGGGGTAATGATACCGATGAAACGAGAGA  
 GGATGCTCACGATACGGGTTACTGATGATGAACATGCCCGGTTACTGGAACGTTGTGAGGG-  
 TAAACAACCTGGCGGTATGGATGCGGCGGGACCAGAGAAAAATCACTCAGGGTCAATGCCAGC  
 GCTTCGTTAATACAGATGTAGGTGTTCCACAGGGTAGCCAGCAG-  
 CATCCTGCGATGCAGATCCGGAACATAATGGTGCAGGGCGCTGACTTCCGCGTTTCCAGACTT  
 TACGAAACACGGAAACCGAAGACCATTCATGTTGTTGCTCAGGTCGACAGCCTTTGCAG-  
 CAGCAGTCGCTTCACGTTTCGCTCGCGTATCGGTGATTCACTTCTGCTAACAGTAAGGCAACCC  
 CGCCAGCCTAGCCGGGTCTCAACGACAGGAGCACGATCATGCGCACCCGTGGCCAG-  
 GACCCAACGCTGCCCCGAGATGCGCCGCGTGCGGCTGCTGGAGATGGCGGACGCGATGGATAT  
 GTTCTGCCAAGGGTTGGTTTGCGCATTACAGTTCTCCGCAAGAATT-  
 GATTGGCTCCAATTCTTGAGTGGTGAATCCGTTAGCGAGGTGCCGCGGCTTCCATTACAGGT  
 CGAGGTGGCCCGGCTCCATGCACCGCGACGCAACGCGGGGAGGCAGA-  
 CAAGGTATAGGGCGGCGCCTACAATCCATGCCAACCCGTTCCATGTGCTCGCCGAGGCGGCA  
 TAAATCGCCGTGACGATCAGCGGTCCAGTGATCGAAGTTAGGCTGGTAA-  
 GAGCCGCGAGCGATCCTTGAAGCTGTCCCTGATGGTTCGTCATCTACCTGCCTGGACAGCATGG  
 CCTGCAACGCGGGCATCCCGATGCCGCGGAAGCGAGAAGAATCATAATGGG-  
 GAAGGCCATCCAGCCTCGCGTCGCGAACGCCAGCAAGACGTAGCCAGCGCGTCGGCCGCCA  
 TGCCGCGCATAATGGCCTGCTTCTCGCCGAAACGTTTGGTGGCGGGACCAGTGAC-  
 GAAGGCTTGAGCGAGGGCGTGCAAGATTCCGAATACCGCAAGCGACAGGCCGATCATCGTCG  
 CGCTCCAGCGAAAGCGGTCTCGCCGAAATGACCCAGAGCGCTGCCGGCACCTGTCTAC-  
 GAGTTGCATGATAAAGAAGACAGTCATAAGTGCGGCGACGATAGTCATGCCCCGCGCCCACC  
 GGAAGGAGCTGACTGGGTTGAAGGCTCTCAAGGGCATCGGTCTGA-  
 GATCCCGGTGCCTAATGAGTGAGCTAACTTACATTAATTGCGTTGCGCTCACTGCCCCGCTTCC  
 AGTCGGGAAACCTGTCTGTGCCAGCTGCATTAATGAATCGGCCAACGCGCGGGGA-  
 GAGGCGGTTTGCCTATTGGGCGCCAGGGTGGTTTTTCTTTTACCAGTGAGACGGGCAACAGC  
 TGATTGCCCTTACCCGCTGGCCCTGAGAGAGTTGCAGCAAGCGGTCCACGCTGGTTT-  
 GCCCCAGCAGGCGAAAATCCTGTTTGTGGTGGTTAACGGCGGGATATAACATGAGCTGTCTT  
 CGGTATCGTCGTATCCCACTACCGAGATATCCGCACCAACGCGCAGCCCCGACTCGG-  
 TAATGGCGCGCATTGCGCCCAGCGCCATCTGATCGTTGGCAACCAGCATCGCAGTGGAACG  
 ATGCCCTCATTACGATTTTGCATGGTTTGTGAAAACCGGACATGGCACTCCAG-  
 TCGCCTTCCCGTTCGCTATCGGCTGAATTTGATTGCGAGTGAGATATTTATGCCAGCCAGCC  
 AGACGCAGACGCGCCGAGACAGAACTTAATGGGCCCCGCTAACAGCGCGATTT-  
 GCTGGTGACCCAATGCGACCAGATGCTCCACGCCAGTCGCGTACCGTCTTCATGGGAGAAA  
 ATAATACTGTTGATGGGTGTCTGGTCAGAGACATCAAGAAATAACGCCGGAACATTAGTG-  
 CAGGACGCTTCCACAGCAATGGCATCTTGGTCAGGATCCAGCGGATAGTTAATGATCAGCCACTG  
 ACGCGTTGCGCGAGAAGATTGTGACCGCCGCTTTACAGGCTTCGACGCGCTTCGTTCTAC-  
 CATCGACACCACCGCTGGCACCCAGTTGATCGGCGCGAGATTTAATCGCCGCGACAATTTG  
 CGACGGCGCGTGACAGGGCCAGACTGGAGGTGGCAACGCCAATCAGCAACGACTGTTT-  
 GCCCCGCCAGTTGTTGTGCCACGCGGTTGGGAATGTAATTCAGCTCCGCCATCGCCGCTTCCAC  
 TTTTCCCGGCTTTTCGCAGAAACGTGGCTGGCCTGGTTACACAGCGGGAAACGGTCTGA-  
 TAAGAGACACCGGCATACTCTGCGACATCGTATAACGTTACTGGTTTACATTACACACCTG  
 AATTGACTCTCTTCCGGGCGCTATCATGCCATACCGCGAAAGGTTTT-  
 GCGCCATTTCATGGTGTCCGGGATCTCGACGCTCTCCCTTATGAACGTGTACGGGCTATCTGG  
 CTTTCGTTGCGC

T500\_SWT\_trig-  
 ger\_THS\_A\_trigger  
 (pT7-  
 T500\_SWT\_trigger-  
 T7term-pT7-  
 THS\_A\_trigger-  
 T7term-(Bla Pro-  
 moter)-AmpR-  
 pBR322 origin-back-  
 bone)

TAATACGACTCACTATAGG GATACACATAGAATCATGTGTATGGCGGGCTTTAGGATGA  
 GATGAGAACGATAGAGATGCAAAGGTAAGATGCTAGCATAACCCCTTGGGGCCTCTAAACGG  
 GTCTTGAGGGGTTTTTTCGTAAGGAGGAACTATATCCGGATATCCCGCAAGAGGCCCGG-  
 CAGTACCGGCATAACCAAGCCTATGCCTACAGCATCCAGGGTGACGGTGCCGAGGATGACGA  
 TGAGCGCATTGTTAGATTTTCATACACGGTGCCTGACTGCGTTAGCCGTGTACGGGC-  
 TATCTGGCTTTCGTTGCGCTAATACGACTCACTATAGG GCTCGATCACTAATCTGATCGAGAC  
 GAACATACCTACCTTCATTATCTTACTTGT TAGCATAACCCCTTGGGGCCTCTAAAC-  
 GGGTCTTGAGGGGTTTTTTCGTAAGGAGGAACTATATCCGGATATCCCGCAA-  
 GAGGCCCGGCAGTACCGGCATAACCAA-  
 GCCTATGCCTACAGCATCCAGGGTGACGGTGCCGAGGATGACGATGAGCGCATTGTTAGATTT  
 CATACACGGTGCCTGACTGCGTTAGCAATTTAACTGTGATAAACTACCGCATTAAA-  
 GCTTATCGATGATAAGCTGTCAAACATGAGAATTCTTGAAGACGAAAGGGCCTCGTGATACG  
 CCTATTTTTATAGGTTAATGTCATGATAATAATGGTTTCTTAGACGTCAAGTTGGCAC-  
 TTTTCGGGGAATGTGCGCGGAACCCCTATTTGTTTATTTTCTAAATACAT TCAAATATGTAT

CCGCTCATGAGACAATAACCCCTGATAAATGCTTCAATAATATTGAAAAAGGAAGAGTATGAG-  
TATTCAACATTTCCGTGTCGCCCTTATTCCCTTTTTTGCGGCATTTCCTGTTTTTGCTC  
ACCCAGAAACGCTGGTGAAAGTAAAGATGCTGAAGATCAGTTGGGTGCACGAG-  
TGGGTTACATCGAACTGGATCTCAACAGCGGTAAGATCCTTGAGAGTTTTCGCCCCGAAGAAC  
GTTTTCCAATGATGAGCACTTTTAAAGTTCTGCTATGTGGCGCGGTATTATCCCGTGTTGAC-  
GCCGGGCAAGAGCAACTCGGTGCGCCGCATACACTATTCTCAGAATGACTTGGTTGAGTACTCA  
CCAGTCACAGAAAAGCATCTTACGGATGGCATGACAGTAAGAGAATTATGCAGTGCTGCCA-  
TAACCATGAGTGATAACACTGCGGCCAACTTACTTCTGACAACGATCGGAGGACCGAAGGAG  
CTAACCGCTTTTTTGACAACATGGGGGATCATGTAACTCGCCTTGATCGTTGGGAACCG-  
GAGCTGAATGAAGCCATACCAAACGACGAGCGTGACACCACGATGCCTGCAGCAATGGCAAC  
AACGTTGCGCAAACCTATTAAGTGGCGAACTACTTACTCTAGCTTCCCGGCAACAATTAA-  
TAGACTGGATGGAGGCGGATAAAGTTGCAGGACCACTTCTGCGCTCGGCCCTTCCGGCTGGCT  
GGTTTATTGCTGATAAATCTGGAGCCGGTGAGCGTGGGTCTCGCGGTATCATTGCAGCAC-  
TGGGGCCAGATGGTAAGCCCTCCCGTATCGTAGTTATCTACACGACGGGAGTCAGGCAACT  
ATGGATGAACGAAATAGACAGATCGCTGAGATAGGTGCCTCACTGATTAAGCATTGG-  
TAACTGTGACACCAAGTTTACTCATATATACTTTAGATTGATTTAAAACTTCATTTTTTAATTTA  
AAAGGATCTAGGTGAAGATCCTTTTTTGATAATCTCATGACCAAAATCCCTTAACGTGAG-  
TTTTCGTTCCACTGAGCGTCAGACCCCGTAGAAAAAGATCAAAGGATCTTCTTGAGATCCTTTTT  
TTCTGCGCGTAATCTGCTGCTTGCAAACAAAAAAACCACCGCTACCAGCGGTGGTTTGTTT-  
GCCGGATCAAGAGCTACCAACTCTTTTTCCGAAGGTAAGTGGCTTACAGCAGAGCGCAGATACC  
AAATACTGTCTTCTAGTGAGCCGTAGTTAGGCCACCACTTCAAGAACTCTGTAGCAC-  
CGCCTACATACCTCGCTCTGCTAATCCTGTTACCAGTGGCTGCTGCCAGTGGCGATAAGTCGT  
GTCTTACCGGGTTGGACTCAAGACGATAGTTACCGGATAAGGCGCAGCGGTGCGGCTGAAC-  
GGGGGGTTCTGTGCACACAGCCAGCTTGGAGCGAACGACCTACACCGAACTGAGATACCTAC  
AGCGTGAGCTATGAGAAAGCGCCACGCTTCCCGAAGGGAGAAAGGCGGACAGGTATCCGG-  
TAAGCGGCAGGGTCGGAACAGGAGAGCGCACGAGGGAGCTTCCAGGGGGAAACGCCTGGTA  
TCTTTATAGTCCTGTGCGGGTTTCGCCACCTCTGACTTGAGCGTCGATTTTT-  
GTGATGCTCGTCAGGGGGGCGGAGCCTATGGAAAACCGCCAGCAACGCGGCCCTTTTTACGGT  
TCTGGCCTTTTGCTGGCCTTTTGCTCACATGTTCTTTCCTGCGTTATCCCTGATTCTGTG-  
GATAACCGTATTACCGCCTTTGAGTGAGCTGATACCGCTCGCCGCAGCCGAACGACCGAGCG  
CAGCGAGTCAGTGAGCGAGGAAGCGGAAGAGCGCCTGATGCGGTATTTTCTCCTTAC-  
GCATCTGTGCGGTATTTACACCGCATATATGGTGCACCTCTCAGTACAATCTGCTCTGATGCC  
GCATAGTTAAGCCAGTATACACTCCGCTATCGCTAC-  
GTGACTGGGTGATGGCTGCGCCCCGACACCCGCCAACACCCGCTGACGCGCCCTGACGGGCTT  
GTCTGCTCCCGGCATCCGCTTACAGACAAGCTGTGACCGTCTCCGGGAGCTG-  
CATGTGTCAGAGGTTTTACCGTCATCACCGAAACGCGCGAGGCGAGCTGCGGTAAAGCTCATC  
AGCGTGGTCGTGAAGCGATTACAGATGTCTGCTGCTTCCGCTCCAGCTCCAGCTCGTTGAG-  
TTTCTCCAGAAGCGTTAATGTCTGGCTTCTGATAAAGCGGGCCATGTTAAGGGCGGTTTTTTCC  
TGTTTGGTCACTGATGCCTCCGTGTAAGGGGGATTCTGTTCATGGGGGTAATGATAC-  
CGATGAAACGAGAGAGGATGCTCACGATACGGGTACTGATGATGAACATGCCCGGTTACTG  
GAACGTTGTGAGGGTAAACAACCTGGCGGTATGGATGCGGCGGGACCAGAGAAAAATCAC-  
TCAGGGTCAATGCCAGCGCTTCGTTAATACAGATGTAGGTGTTCCACAGGGTAGCCAGCAGC  
ATCCTGCGATGCAGATCCGGAACATAATGGTG-  
CAGGGCGCTGACTTCCGCGTTTTCCAGACTTTACGAAACACGGAAACCGAAGACCATTTCATGTT  
GTTGCTCAGGTCGCAGACGTTTTTGACGAGCAGTCGCTTCACGTTGCTCGCG-  
TATCGGTGATTTCATTCTGCTAACCAGTAAGGCAACCCCGCCAGCCTAGCCGGGTCCTCAACGA  
CAGGAGCACGATCATGCGCACCCGTGGCCAGGACCCAACGCTGCCCCGA-  
GATGCGCCGCGTGCGGCTGCTGGAGATGGCGGACGCGATGGATATGTTCTGCCAAGGGTTGG  
TTTGCGCATTACAGTTCTCCGCAAGAATTGATTGGCTCCAATTCTTGAG-  
TGGTGAATCCGTTAGCGAGGTGCCGCCGGCTTCCATTACAGTTCGAGGTGGCCCCGGCTCCATGC  
ACCGCGACGCAACGCGGGGAGGCAGACAAGGTATAGGGCGGGCGCC-  
TACAATCCATGCCAACCCGTTCCATGTGCTCGCCGAGGCGGCATAAATCGCCGTGACGATCAG  
CGGTCCAGTGATCGAAGTTAGGCTGGTAAGAGCCGCGAGCGATCCTTGAA-  
GCTGTCCCTGATGGTCGTCTACCTGCCTGGACAGCATGGCCTGCAACGCGGGCATCCCGA  
TGCCGCCCGGAAGCGAGAAGAATCATAATGGGGAAGGCCATCCAGCCTCGCGTCGCGAAC-  
GCCAGCAAGACGTAGCCCAGCGCGTCGGCCGCCATGCCGGCGATAATGGCCTGCTTCTCGCC  
GAAACGTTTTGGTGGCGGGACCAAGTGACGAAGGCTTGAGCGAGGGCGTGCAAGATTCCGAA-  
TACCGCAAGCGACAGGCCGATCATCGTCGCGCTCCAGCGAAAGCGGTCTCGCCGAAAATGA  
CCCAGAGCGCTGCCGGCACCTGTCTACGAGTTGCATGATAAAGAAGACAG-  
TCATAAGTGGCGGACGATAGTCATGCCCCGCGCCACCAGGAAGGAGCTGACTGGGTTGAAG  
GCTCTCAAGGGCATCGGTGAGATCCCGGTGCCTAATGAGTGAGTAACTTACATTAATT-  
GCGTTGCGCTCACTGCCCGCTTTCCAGTCGGGAAACCTGTCGTGCCAGCTGCATTAATGAATC

GGCCAACGCGCGGGGAGAGGGCGGTTTGCCTATTGGGCGCCAGGGTGGTTTTCTTTTCAC-  
CAGTGAGACGGGCAACAGCTGATTGCCCTTCACCGCTGGCCCTGAGAGAGTTGCAGCAAGC  
GGTCCACGCTGGTTTGCCCCAGCAGGCGAAAATCCTGTTTGATGGTGGTTAACGGCGGGGATA-  
TAACATGAGCTGTCTTCGGTATCGTCGTATCCCACTACCGAGATATCCGCACCAACGCGCAGC  
CCGGACTCGGTAATGGCGCGCATTGCGCCAGCGCCATCTGATCGTTGGCAACCAGCATCG-  
CAGTGGAACGATGCCCTCATTACGACATTTGCATGGTTTGTGAAAACCGGACATGGCACTCC  
AGTCGCCTTCCCGTTCCGCTATCGGCTGAATTTGATTGCGAGTGAGA-  
TATTTATGCCAGCCAGCCAGACGACGCGCCGAGACAGAACTTAATGGGCCCCTAACAG  
CGCGATTTGCTGGTGACCAATGCGACCAGATGCTCCACGCCAGTCGCGTAC-  
CGTCTTCATGGGAGAAAATAATACTGTTGATGGGTGTCTGGTCAGAGACATCAAGAAATAAC  
GCCGGAACATTAGTGACGGCAGCTTCCACAGCAATGGCATCCTGGTCATCCAGCGGA-  
TAGTTAATGATCAGCCCACTGACGCGTTGCGCGAGAAGATTGTGCACCGCCGCTTTACAGGCT  
TCGACGCCGCTTCGTTCTACCATCGACACCACCACGCTGGCACCCAGTTGATCGGCGCGA-  
GATTTAATCGCCGCGACAATTTGCGACGGCGCGTGCAGGGCCAGACTGGAGGTGGCAACGCC  
AATCAGCAACGACTGTTTGCCCGCCAGTTGTTGTGCCACGCGGTTGG-  
GAATGTAAATTCAGCTCCGCCATCGCCGCTTCCACTTTTCCCGCGTTTTCGCGAGAAACGTGGCT  
GGCCTGGTTACCCACGCGGGAAACGGTCTGATAAGAGACACCGGCATACTCTGCGACATCG-  
TATAACGTTACTGGTTTCACATTCACCACCCTGAATTGACTCTCTTCCGGGCGCTATCATGCCA  
TACCGCGAAAGGTTTTGCGCCATTCGATGGTGTCCGGGATCTCGACGCTCTCCCTTATGAAC-  
GTGTACGGGCTATCTGGCTTTTCGTTGCGC

**Supplementary Table S3.** Promoter Sequences Used in This Study. Plasmid sequences can be constructed by replacing the yellow region in the example plasmids in Table S2 with the yellow region indicated here.

| Name    | Sequence                                                            |
|---------|---------------------------------------------------------------------|
| pT7     | TAATACGACTCACTATAGG                                                 |
| pJ23119 | TTGACAGCTAGCTCAGTCCTAGGTATAA-<br>TACTAGT                            |
| pLlacO  | ATAAATGTGAGCGGATAACATTGACATT-<br>GTGAGCGGATAACAAGATACTGAG-<br>CACGG |

**Supplementary Table S4.** Insert Sequences Used in This Study. Plasmid sequences can be constructed by replacing the grey region in the example plasmids in Table S2 with the grey region indicated here.

| Name           | Sequence                                                                                            |
|----------------|-----------------------------------------------------------------------------------------------------|
| decoy          | TCTCAGCCCTCAGCTGGGCGTGAGATGAGCCTCGTCTCCAGATGACGAGGCAAC-<br>GTAGGATCTGACTGATCCTACTAT                 |
| T500_SWT       | CCATCTTACCTTTGCATCTCTATCGTTCTCATCTCATCCTAAA-<br>GCCCCGCCGAAAGGCGGGGCTTTTTTTT                        |
| BBa_SWT        | CCATCTTACCTTTGCATCTCTATCGTTCTCATCTCATCCTTTGTTTCCAGAAC-<br>GCTCGGTCTTGACACCGGGCGTTTTTTTTTT           |
| STAR_target_WT | AGTTTTTACAGTGAATTGTTTTAATTAGTTGTATAAATGTTGGAGCAGCGGG-<br>GAATGTATACAGTTTCATGTATATATCCCCGCTTTTTTTTTT |
| STAR_target_1  | CCATCTTACCTTTGCATCTCTATCGTTCTCATCTCATCCTGCGGGGAATGTATA-<br>CAGTTTCATGTATATATATCCCCGCTTTTTTTTTT      |
| THS_A          | GAGTAAGATAATGAAGGTAGGTATGTTAACTTTAGAACAGAGGAGATAAA-<br>GATGAACATACCTACG                             |
| THS_B          | GACTGATTTGAATACACTGCTTCGTTCAAGATTCAGAACAGAGGAGATGAA-<br>TATGGAACGAAGCAGA                            |
| THS_C          | GATTGAATATGATAGAAGTTTAGTAGTAGACAATAGAACAGAGGAGA-<br>TATTGATGACTACTAACT                              |
| T500_SWT_P1V1  | CCATCTTACCTTTGCATCTC-<br>TATCGTTCTCATCTCATCCTAAACCCCGCCGAAAGGCGGGGTTTTTTTTT                         |
| T500_SWT_P1V2  | CCATCTTACCTTTGCATCTCTATCGTTCTCATCTCATCCTAAA-<br>GCCCCGCCGAAAGGCGGGGTTTTTTTTT                        |
| T500_SWT_P1V3  | CCATCTTACCTTTGCATCTC-<br>TATCGTTCTCATCTCATCCTAAACCCCGCCGAAAGGCGGGGTTTTTTTTT                         |
| T500_SWT_P2V3  | CCATCTTACCTTTGCATCTC-<br>TATCGTTCTCATCTCATCCTAAAGTCCGCCGAAAGGCGGACTTTTTTTTTT                        |

|               |                                                                                              |
|---------------|----------------------------------------------------------------------------------------------|
| T500_SWT_P3V3 | CCATCTTACCTTTGCATCTCTATCGTTCTCATCTCATCCTAAA-<br>GCTCGCCGAAAGGCGAGCTTTTTTTT                   |
| Target_6      | CCAGTCATCAAGTCAGTCCAGTCAAAGTTTCCGTCGTTACGCGGGGAATGTATA-<br>CAGTTCATGTATATATTCCCCGCTTTTTTTTTT |
| Toehold_3     | GGGATCTATTACTACTTACCATTGTCTTGCTCTATACAGAAACAGAGGAGATA-<br>TAGAATGAGACAATGG                   |
| T500_SWT_2    | CCTCCATCTCCATATTCTTATCTCATTATCATCTCACTTTAAA-<br>GCCCGCCGAAAGGCGGGCTTTTTTTTTT                 |
| T500_SWT_3    | CCTCTATCCTATCTATCTGCCTGTCCTGTCTGTCTTTAAA-<br>GCCCGCCGAAAGGCGGGCTTTTTTTTTT                    |

**Supplementary Table S5.** Trigger Sequences Used in This Study. Plasmid sequences can be constructed by replacing the red region in the example plasmids in Table S2 with the red region indicated here.

| Name                   | Sequence                                                                              |
|------------------------|---------------------------------------------------------------------------------------|
| T500_SWT_trigger       | GATACACATAGAATCATGTGTATGGCGGGCTTTAGGATGAGATGAGAACGATA-<br>GAGATGCAAAGGTAAGATGG        |
| BBa_SWT_trigger        | GATACACATAGAATCATGTGTATGTGCAAGAC-<br>CGAGCGTTCTGAACAAAGGATGAGATGAGAACGATAGAGATGCAAAGG |
| STAR_target_WT_trigger | TGAACTGTATACATTCCCCGCTGCTCCAACATTTATA-<br>CAACTAATTAAAAACAATTCACTGTAAAAACT            |
| STAR_target_1_trigger  | TGAACTGTATACATTCCCCGCGAGGATGAGATGAGAACGATAGA-<br>GATGCAAAGGTAAGATGG                   |
| THS_A_trigger          | GCTCGATCACTAATCTGATCGAGACGAACATACCTACCTTCATTATCTTACTTGT                               |
| THS_B_trigger          | GAGTTGCGGCACGGACCGCAACTATAGAACGAAGCAGTGTATTCAAATCAGTTAG                               |
| THS_C_trigger          | GATACACATAGAATCATGTGTATAACACTACTAACTTCTATCATATTCAATCAC                                |
| T500_SWT_P1V1_trigger  | GATACACATAGAATCATGTGTATGGCGGGGTTTAGGATGAGATGAGAACGATA-<br>GAGATGCAAAGGTAAGATGG        |
| T500_SWT_P2V1_trigger  | GATACACATAGAATCATGTGTATGGCGGGCTTTAGGATGAGATGAGAACGATA-<br>GAGATGCAAAGGTAAGATGG        |
| STAR_6                 | TGAACTGTATACATTCCCCGCTGAACGACGGAACTTTGACTGGACTGACTT-<br>GATGACTGG                     |
| Trigger_3              | GGGTGATGGGACATTCCGATGTCCCATCAATAAGAGCAAGACAATGGTAAGTAG-<br>TAATAGATAAG                |
| T500_SWT_2_trigger     | GATACACATAGAATCATGTGTATGGCGGGCTTTAAAGTGAGATGATAATGAGA-<br>TAAGAATATGGAGATGGAGG        |
| T500_SWT_3_trigger     | GATACACATAGAATCATGTGTATGGCGGGCTTTAAAGACACAGGACAG-<br>GACAGGCAGATAGATAGGATAGAGG        |

**Supplementary Table S6.** Terminator Sequences Used in This Study. Plasmid sequences can be constructed by replacing the pink region in the example plasmids in Table S2 with the pink region indicated here.

| Name     | Sequence                                             |
|----------|------------------------------------------------------|
| T7term   | TAGCATAACCCCTTGGGGCCTCTAAAC-<br>GGGTCTTGAGGGGTTTTTTG |
| T500term | CAAA-<br>GCCCGCCGAAAGGCGGGCTTTTTTTTTT                |

**Supplementary Table S7.** Other Accessary Sequences Used in This Study. Accessary sequences used for constructing plasmids are indicated here.

| Name     | Sequence                                                                                                             |
|----------|----------------------------------------------------------------------------------------------------------------------|
| RBS      | AGAGGAGA                                                                                                             |
| WeissRBS | ATTAAAGAGGAGAAATTAAGC                                                                                                |
| linker A | AACCTGGCGGCAGCGCAAAAG                                                                                                |
| linker B | CTCTTCTATCCTCCTAACTCT                                                                                                |
| linker C | CACCTAACTACGACCCAACCT                                                                                                |
| GFPmut3b | ATGCGTAAAGGAGAAGAAGCTTTTCACTGGAGTTGTCCCAATTCTTGTGTAATT-<br>AGATGGTGATGTTAATGGGCACAAATTTTCTGTCACTGGAGAGGGTGAAGGTGATGC |

|         |                                                                                                                                                                                                                                                                                                                                                                                                                                                                                                                                                                                                                                                                                                                                                                                                                 |
|---------|-----------------------------------------------------------------------------------------------------------------------------------------------------------------------------------------------------------------------------------------------------------------------------------------------------------------------------------------------------------------------------------------------------------------------------------------------------------------------------------------------------------------------------------------------------------------------------------------------------------------------------------------------------------------------------------------------------------------------------------------------------------------------------------------------------------------|
| mCherry | AACATACGGAAAACCTTACCCTTAAATTTATTTGCACTACTGGAAAACCTAC<br>CTGTTCCGTGGCCAACTTGTCACTACTTTCGGTTATGGTGTTCAATGCTTTGCGAGA<br>TACCCAGATCACATGAAACAGCATGACTTTTTCAAGAGTGCCATGCCCAGAGGTTAC-<br>GTACAGGAAAGAACTATATTTTTCAAGATGACGGGAACTACAAGACACGTGCTGAA<br>GTCAAGTTTGAAGGTGATACCCTTGTTAATAGAATCGAGTTAAAAGGTATTGAT-<br>TTTAAA-<br>GAAGATGGAAACATTCTTGGACACAAATTGGAATACAACCTATAACTCACACAATGTA<br>TACATCATGGCAGACAAACAAAAGAATGGAATCAAAGTTAACTTCAAAATTAGA-<br>CACAACATTGAAGATGGAAGCGTTCAACTAGCAGACCATTATCAACAAAATACTCCG<br>ATTGGCGATGGCCCTGTCCTTTTACCAGACAACCATTAC-<br>CTGTCCACACAATCTGCCCTTTCGAAAGATCCCAACGAAAAGAGAGACCACATGGTC<br>CTTCTTGAGTTTGTAACCGCTGCTGGGATTACACATGGCATGGATGAACTATA-<br>CAAAAGGCCTGCAGCAAACGACGAAAACCTACGCTGCATCAGTTTAATAA                                                                                |
|         | ATGCGTAAAGTGAGCAAGGGCGAAGAAGATAACATGGCCATCATCAAGGAG-<br>TTCATGCGCTTCAAGGTTACATGGAGGGCTCCGTGAACGGCCACGAGTTCGAGATC<br>GAGGGCGAGGGCGAGGGCCGCCCTACGAGGGCACCCAGACCGCCAA-<br>GCTGAAGGTGAC-<br>CAAGGGTGGCCCCCTGCCCTTCGCCTGGGACATCCTGTCCCCTCAGTTCATGTACGGC<br>TCCAAGGCCTACGTGAAGCACCCCGCCGACATCCCCGACTACTTGAA-<br>GCTGTCCTTCCCCGAGGGGCTTCAAGTGGGAGCGCGTGATGAACTTCGAGGACGGCGG<br>CGTGGTGACCGTGACCCAGGACTCCTCCCTGCAGGACGGCGAG-<br>TTCATCTACAAGGTGAA-<br>GCTGCGCGGCACCAACTTCCCCTCCGACGGCCCCGTAATGCAGAAGAAGACCATGGG<br>CTGGGAGGCCTCCTCCGAGCGGATGTACCCGAGGACGGCGCGCTGAAGGGCGA-<br>GATCAA-<br>GCAGAGGCTGAAGCTGAAGGACGGCGGCCACTACGACGCTGAGGTCAAGACCACCT<br>ACAAGGCCAAGAAGCCCGTGCAACTGCCCGGCGCGTACAACGTCAACATCAAGTT-<br>GGACATCACCTCCCACAACGAGGACTACACCATCGTGGAACAGTACGAACGCGCCGA<br>GGGCCGCCACTCCACCGGCGGCATGGACGAGCTGTACAAGTA |
|         | TCTATCATTTGATAGGGTTT                                                                                                                                                                                                                                                                                                                                                                                                                                                                                                                                                                                                                                                                                                                                                                                            |
|         | ATGTCTAGATTAGATAAAAGTAAAGTGATTAAACAGCGCATT-<br>AGAGCTGCTTAATGAGGTCG-<br>GAATCGAAGGTTTAAACAACCCGTAAACTCGCCAGAAAGCTAGGTGTAGAGCAGCCTA<br>CATTGTATTGGCATGTAAAAAATAAGCGGGCTTTGCTCGACGCCTTAGCCATTGA-<br>GATGTTA-<br>GATAGGCACCATACTCACTTTTGCCCTTTAGAAGGGGAAAGCTGGCAAGATTTTTTAC<br>GTAATAACGCTAAAAGTTTATAGATGTGCTTTACTAAGTCATCGCGATGGAG-<br>CAAAAGTACATTTAGGTACACGGCCTACAGAAAAACAGTATGAAACTCTCGAAAATC<br>AATTAGCCTTTTATGCCAACAAAGGTTTTTCACTAGAGAATGCATTATATGCAC-<br>TCAGCGCTGTGGGGCATTTTACTTTAGGTTGCGTATTGGAAGATCAAGAGCATCAAGT<br>CGCTAAAGAAGAAAGGGGAAACACCTACTACTGATAGTATGCCGCCATTATTAC-<br>GACAAGC-<br>TATCGAATTATTTGATCACCAAGGTGCAGAGCCAGCCTTCTTATTTCGGCCTTGAATTG<br>ATCATATGCGGATTAGAAAAACAACCTTAAATGTGAAAGTGGGTCT                                                                                                 |
|         |                                                                                                                                                                                                                                                                                                                                                                                                                                                                                                                                                                                                                                                                                                                                                                                                                 |
|         |                                                                                                                                                                                                                                                                                                                                                                                                                                                                                                                                                                                                                                                                                                                                                                                                                 |
|         |                                                                                                                                                                                                                                                                                                                                                                                                                                                                                                                                                                                                                                                                                                                                                                                                                 |
|         |                                                                                                                                                                                                                                                                                                                                                                                                                                                                                                                                                                                                                                                                                                                                                                                                                 |
|         |                                                                                                                                                                                                                                                                                                                                                                                                                                                                                                                                                                                                                                                                                                                                                                                                                 |
|         |                                                                                                                                                                                                                                                                                                                                                                                                                                                                                                                                                                                                                                                                                                                                                                                                                 |
|         |                                                                                                                                                                                                                                                                                                                                                                                                                                                                                                                                                                                                                                                                                                                                                                                                                 |
| TetO    |                                                                                                                                                                                                                                                                                                                                                                                                                                                                                                                                                                                                                                                                                                                                                                                                                 |
| TetR    |                                                                                                                                                                                                                                                                                                                                                                                                                                                                                                                                                                                                                                                                                                                                                                                                                 |
|         |                                                                                                                                                                                                                                                                                                                                                                                                                                                                                                                                                                                                                                                                                                                                                                                                                 |
|         |                                                                                                                                                                                                                                                                                                                                                                                                                                                                                                                                                                                                                                                                                                                                                                                                                 |
|         |                                                                                                                                                                                                                                                                                                                                                                                                                                                                                                                                                                                                                                                                                                                                                                                                                 |
|         |                                                                                                                                                                                                                                                                                                                                                                                                                                                                                                                                                                                                                                                                                                                                                                                                                 |
|         |                                                                                                                                                                                                                                                                                                                                                                                                                                                                                                                                                                                                                                                                                                                                                                                                                 |
|         |                                                                                                                                                                                                                                                                                                                                                                                                                                                                                                                                                                                                                                                                                                                                                                                                                 |
|         |                                                                                                                                                                                                                                                                                                                                                                                                                                                                                                                                                                                                                                                                                                                                                                                                                 |
|         |                                                                                                                                                                                                                                                                                                                                                                                                                                                                                                                                                                                                                                                                                                                                                                                                                 |
|         |                                                                                                                                                                                                                                                                                                                                                                                                                                                                                                                                                                                                                                                                                                                                                                                                                 |
|         |                                                                                                                                                                                                                                                                                                                                                                                                                                                                                                                                                                                                                                                                                                                                                                                                                 |

Supplementary Table S8. Primers Used for Reverse Transcription and qPCR.

| Primer Name | Sequence (5' to 3')   |
|-------------|-----------------------|
| RT_GFP      | TTACAAACTCAAGAAGGACC  |
| qPCR_GFP_F  | CACTGGAGTTGTCCCAATTCT |
| qPCR_GFP_R  | TCCGTATGTTGCATCACCTTC |
| qPCR_16S_F  | TGGTAGTCCACGCCGTAAAC  |
| qPCR_16S_R  | TTTAACCTTGCGGCCGTACT  |

Supplementary Table S9. RT-qPCR Raw Data.

| GFP Raw Ct     | Trigger      | Decoy        |
|----------------|--------------|--------------|
| BBa K864600    | 13.50 ± 0.07 | 15.77 ± 0.09 |
| T500           | 13.31 ± 0.32 | 20.79 ± 0.09 |
| STAR target WT | 10.97 ± 0.15 | 15.62 ± 0.17 |
| THS C          | 12.99 ± 0.23 | 14.06 ± 0.16 |
| GFP control    | 10.13 ± 0.27 | 29.59 ± 0.96 |

| 16S rRNA Raw Ct | Trigger          | Decoy            |
|-----------------|------------------|------------------|
| BBa K864600     | $7.45 \pm 0.02$  | $7.84 \pm 0.05$  |
| T500            | $7.62 \pm 0.14$  | $7.76 \pm 0.15$  |
| STAR target WT  | $11.68 \pm 0.15$ | $11.60 \pm 0.09$ |
| THS C           | $11.43 \pm 0.06$ | $11.64 \pm 0.05$ |
| GFP control     | $11.44 \pm 0.10$ | $11.29 \pm 0.20$ |

  

|                | $\Delta\Delta Ct$ |
|----------------|-------------------|
| BBa K864600    | $1.88 \pm 0.13$   |
| T500           | $7.34 \pm 0.39$   |
| STAR target WT | $4.73 \pm 0.29$   |
| THS C          | $0.86 \pm 0.29$   |
| GFP control    | $19.61 \pm 1.02$  |

### Supplementary Figures

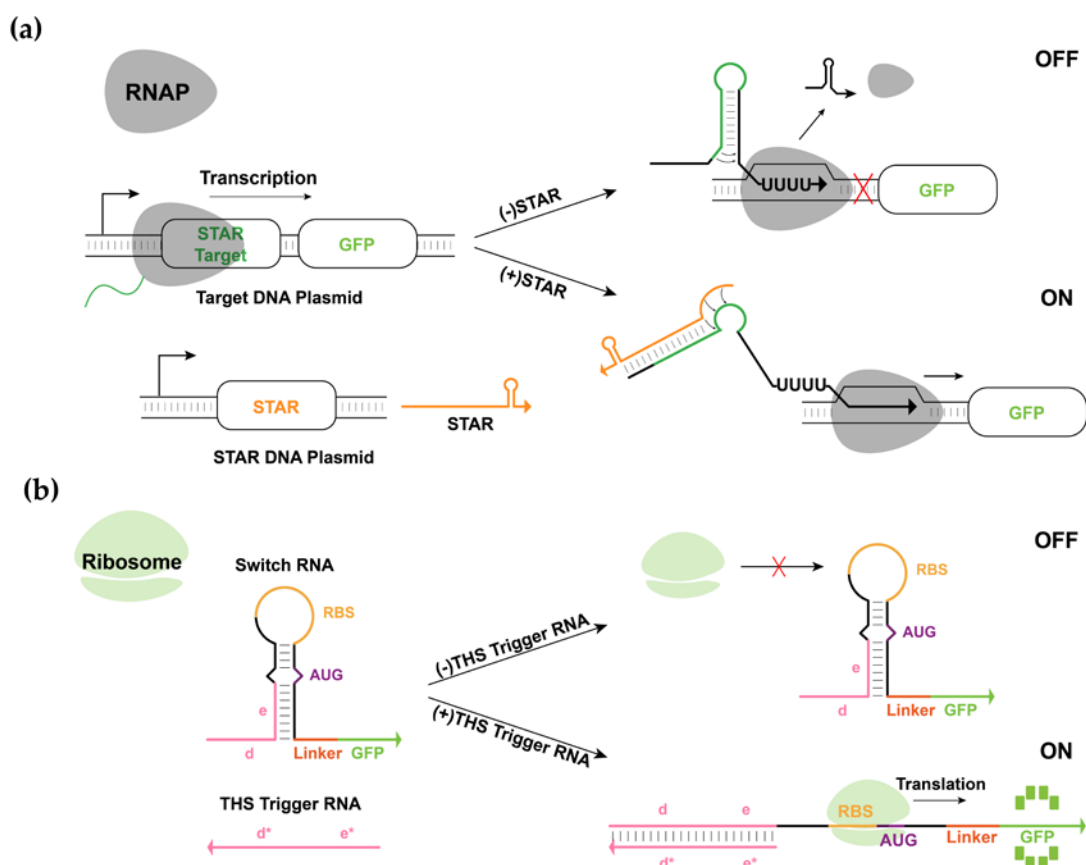

**Supplementary Figure S1.** De-novo-designed Synthetic RNA Regulators, STAR and THS. (a) Schematic of the STAR mechanism. The target RNA folds into a rho-independent transcription terminator that causes RNA polymerase to halt transcription. When STAR binds to the target RNA, terminator formation is prevented, allowing transcription elongation of the gene. (b) Schematic of the toehold switch mechanism. The ribosomal binding site (RBS) and start codon (AUG) of the switch RNA are exposed only when the cognate trigger RNA disrupts the secondary structure.



(a)

**BBa K864600**

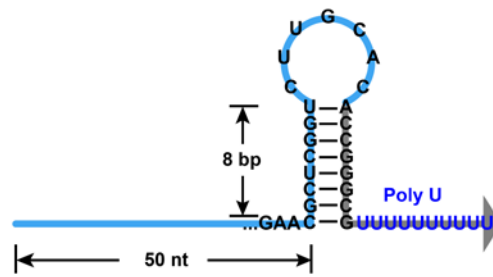

(b)

**T500**

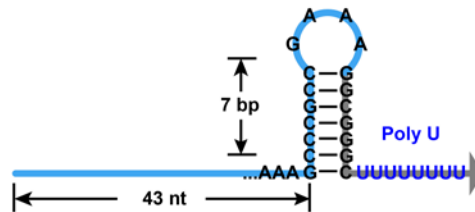

(c)

**STAR target RNA**

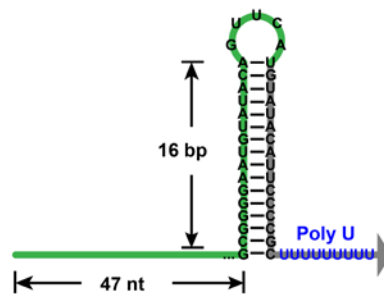

**Supplementary Figure S2.** Switchable Terminator Structure and Sequences. Structures and stem-loop sequences of switchable terminators (SWTs); (a) Natural terminator BBa K864600, (b) synthetic terminator T500, (c) STAR target RNA. For the BBa K864600, the stem length is 1 base pair longer and the loop size is 3 nt longer than the T500. The poly-U tract length of BBa K864600 and T500 is 10 nt and 8 nt, respectively. Sequences of toehold region were omitted. RNA secondary structure was confirmed by NUPACK [20].

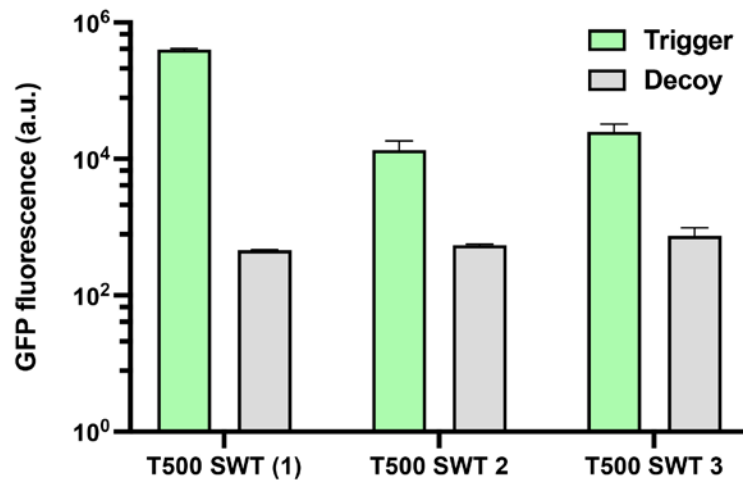

**Supplementary Figure S3.** Fluorescence Characterization of T500 SWT Toehold Variants. The GFP fluorescence of T500 SWT toehold variants were measured in the presence of trigger RNA or decoy RNA. Among the toehold sequences of STAR AD1 Target [25], the top three sequences with the highest fold change were implemented in front of the T500 synthetic terminator. There was no significant difference at the leakage level of each variant, and T500 SWT (1) showed the largest expression. T500 SWT (1) is the same construct with T500 SWT. Relative errors for the GFP fluorescence are from the s.d. of three biological replicates.

(a)

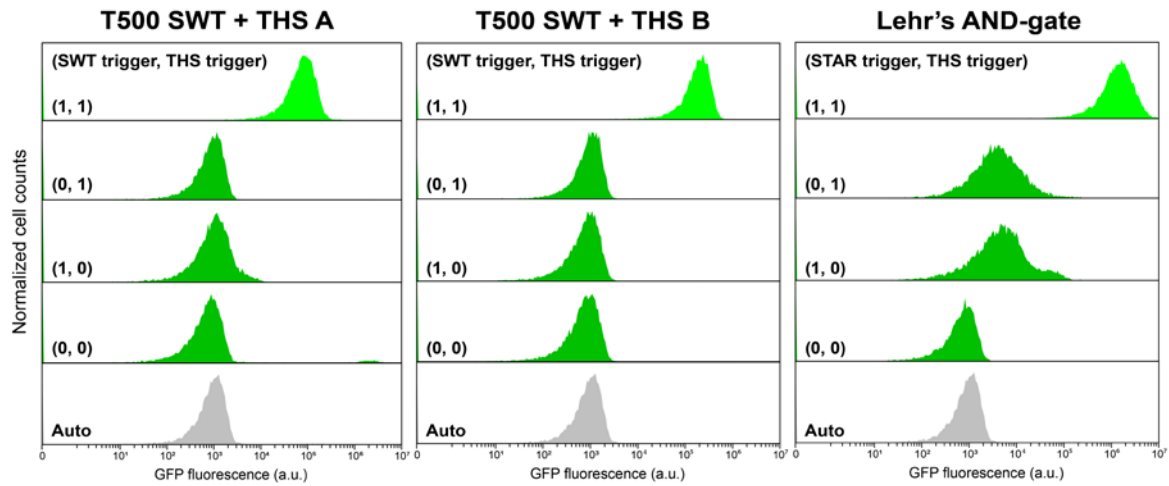

(b)

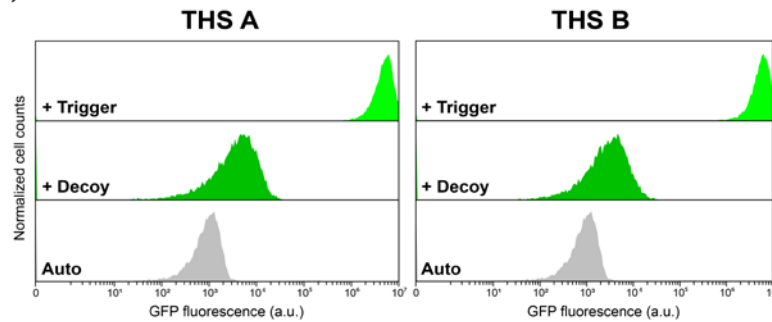

**Supplementary Figure S4.** GFP Fluorescence Histograms of Multilevel Regulatory Systems and Single THS. (a) The GFP fluorescence histograms according to the presence or absence of SWT trigger and THS trigger for the multilevel regulatory systems and Lehr's AND-gate. In the multilevel regulatory system, T500 SWT is followed by THS A or THS B. In the OFF state, the multilevel regulatory systems showed very little leakage level compared to Lehr's AND-gate. (b) The GFP fluorescence histograms according to the presence or absence of cognate THS trigger for the single THS system. Compared to the multilevel regulatory system, single THS showed higher leakage level in the OFF state.

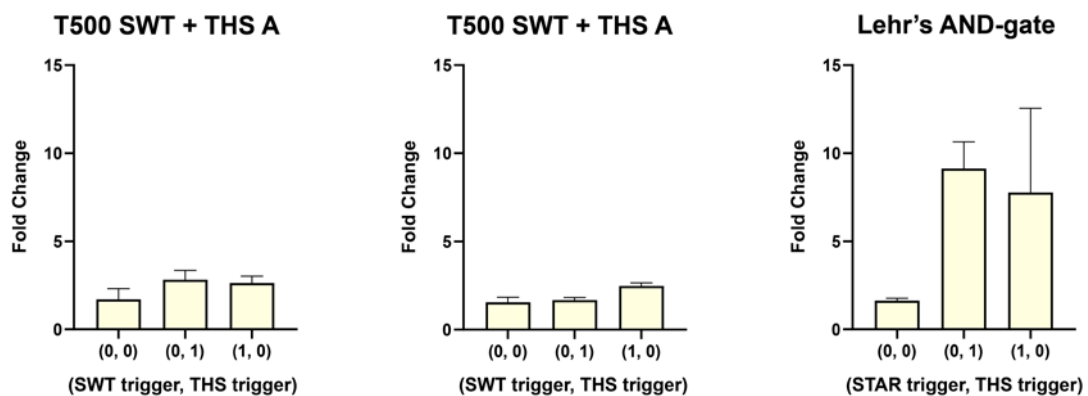

**Supplementary Figure S5.** Logical FALSE States of Multilevel Regulatory Systems. Fold change values were computed by autofluorescence (from Figure S4a) for the logical FALSE states of the multilevel regulatory systems. T500 SWT + THS A and T500 SWT + THS B had little leakage in all three FALSE states. In the absence of both trigger RNAs, Lehr's AND-gate had little leakage, but higher leakage levels were observed in the presence of either the STAR trigger or the THS trigger. Relative errors for fold change value of each conditions are from the s.d. of three biological replicates.

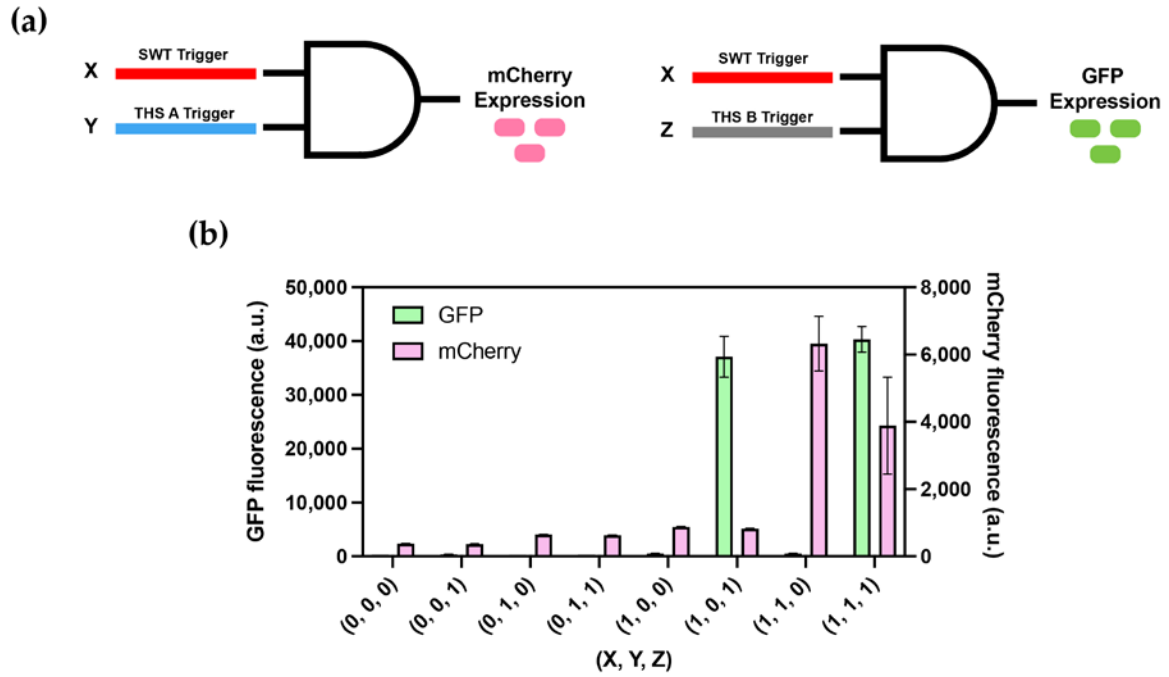

**Supplementary Figure S6.** Multiplexed Gene Expression Control with Exchanged Reporter Protein. (a) Design schematics of multiplexing implementation. mCherry is expressed under the control of the T500 SWT trigger and THS A trigger, and GFP is expressed under the control of the T500 SWT trigger and THS B trigger. (b) Measurement of fluorescent protein outputs via flow cytometry for all input combinations. Each reporter protein was expressed in the presence of an appropriate combination of cognate triggers as expected. Relative errors for mCherry and GFP fluorescence are from the s.d. of three biological replicates.

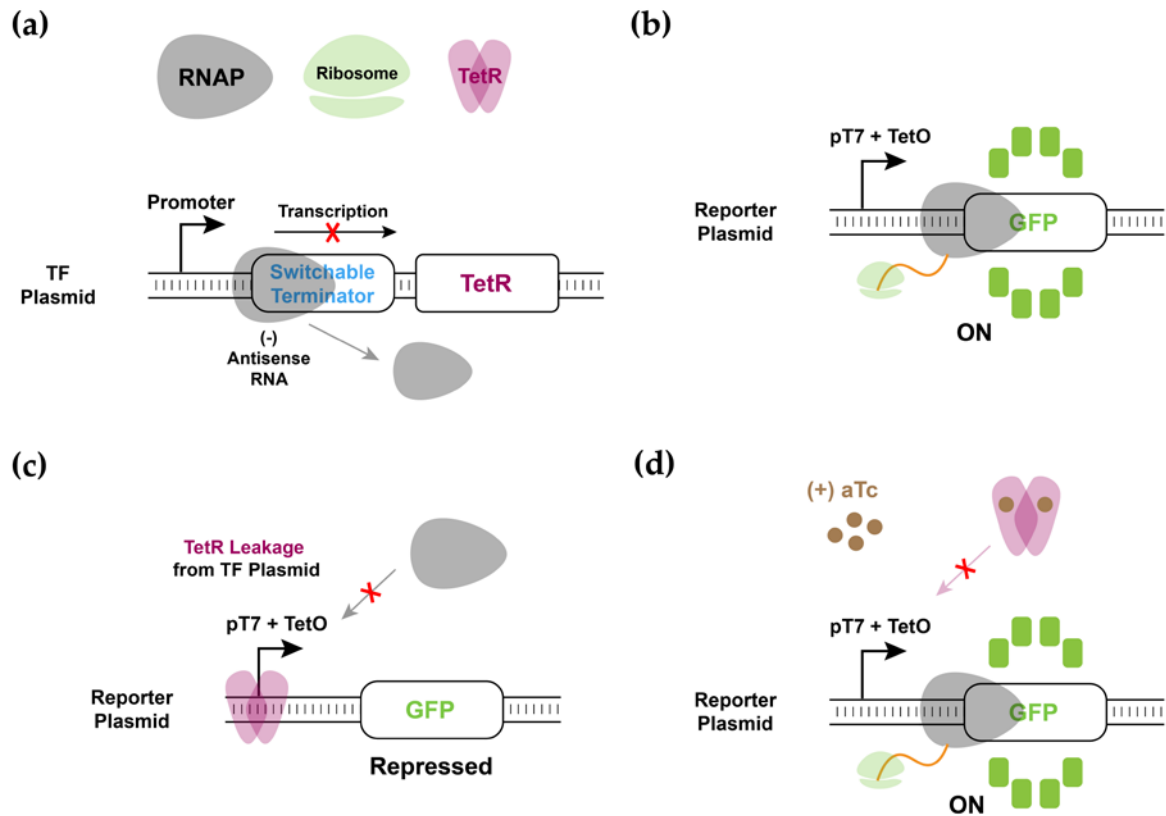

**Supplementary Figure S7.** Detailed Schematics of Multi-layered Circuits. Detailed description of the TetR leakage detection system in Figure 7b. (a) TF plasmid encodes SWT and TetR. In the absence of trigger RNA, TetR expression is repressed. (b) GFP is encoded in reporter plasmid, and fluorescence can be measured when IPTG is treated. (c) The pT7(TetO) in the reporter plasmid can be blocked by leaky TetR from TF plasmid. In this case, the GFP expression will be repressed. (d) If aTc is treated, TetR is released from pT7(TetO) and GFP expression can be restored again.

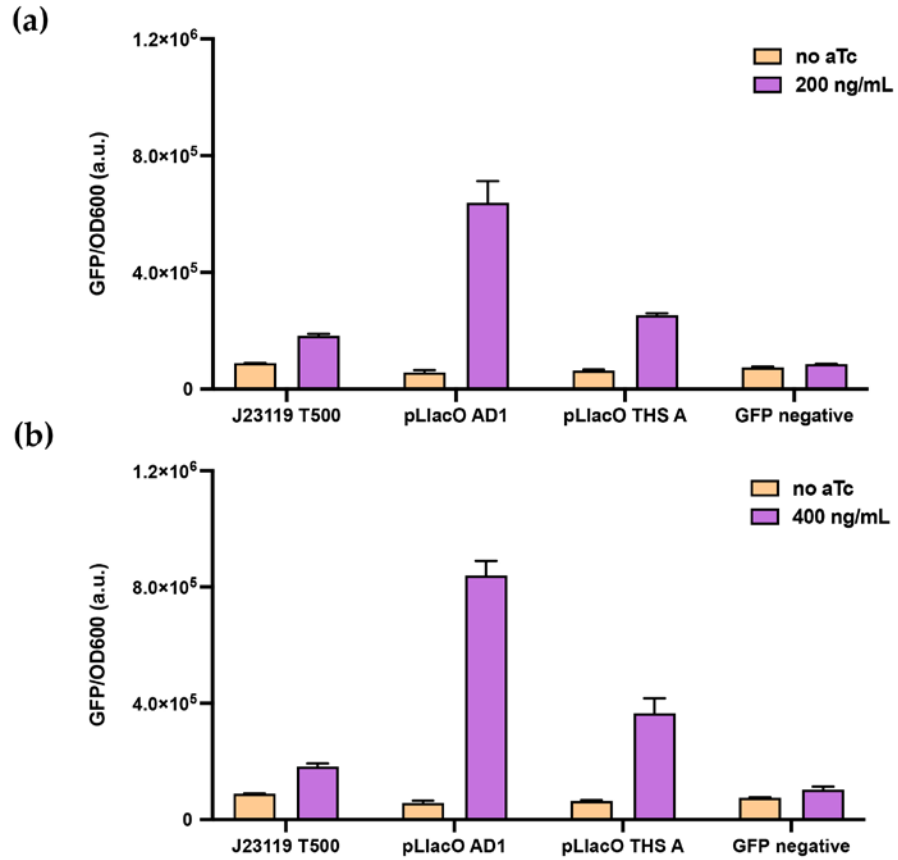

**Supplementary Figure S8.** Characterization of Multi-layered Circuits at High aTc Concentrations. **(a, b)** T500 SWT, STAR target WT, or THS A was attached upstream of TetR to regulate its expression. GFP fluorescence outputs were measured in the presence of trigger RNA. aTc was treated at different concentrations: 200 ng/mL **(a)** and 400 ng/mL **(b)**. GFP negative did not contain RBS upstream of the GFP gene. Relative errors for GFP fluorescence are from the s.d. of three biological replicates.
